# Supplementary material for: Organocatalytic one-pot 1,4-/1,6-/1,2-addition sequence for the stereocontrolled formation of six consecutive stereocenters
Source: PubMed Central journal article supplement (PMC4612129; doi:10.1039/c4cc09730k), 2015-01-07
Supplement: CC-051-C4CC09730K-s001.pdf [file CC-051-C4CC09730K-s001.pdf]

# Organocatalytic one-pot 1,4-/1,6-/1,2-addition sequence for the stereocontrolled formation of six consecutive stereocenters

Pankaj Chauhan, Suruchi Mahajan, Gerhard Raabe and Dieter Enders\*

<sup>a</sup> Institut of Organic Chemistry, RWTH Aachen University Landoltweg 1, 52074 Aachen (Germany)  
E-mail: enders@rwth-aachen.de

## Contents

|                                                                                      |       |
|--------------------------------------------------------------------------------------|-------|
| General Methods and Materials                                                        | 1     |
| General Procedure for the organocatalytic one-pot 1,4-/1,6-/1,2-addition reactions   | 1     |
| Analytic data                                                                        | 2-13  |
| Procedure for the gram-scale organocatalytic one-pot 1,4-/1,6-/1,2-addition reaction | 13    |
| NMR spectra                                                                          | 14-30 |
| HPLC Data                                                                            | 31-45 |

## General Methods and Materials:

All reactions were performed in oven-dried glassware. Analytical TLC was performed using SIL G-25 UV254 from MACHERY & NAGEL and visualized with ultraviolet radiation at 254 nm.  $^1\text{H}$  and  $^{13}\text{C}$  NMR spectra were recorded at ambient temperature on a Varian Innova 600 or Varian Innova 400 instruments with tetramethylsilane as the internal standard. Chemical shifts for  $^1\text{H}$ -NMR and  $^{13}\text{C}$ -NMR are reported in parts per million (ppm), with coupling constants reported in Hertz (Hz). The following abbreviations are used for spin multiplicity: s = singlet, br s = broad singlet, d = doublet, dd = doublet of doublet, t = triplet and m = multiplet. Mass spectra were acquired on a Finnigan SSQ7000 (EI 70 eV) spectrometer and high resolution ESI spectra on a ThermoFisher Scientific LTQ-Orbitrap XL. IR spectra were taken on a PerkinElmer Spectrum 100 FT-IR Spectrometer. Elemental analyses were performed with a Vario EL elemental analyzer. Analytical HPLC was carried out either on a Hewlett-Packard 1050 Series instrument or Agilent 1100 instrument using chiral stationary phases. Optical rotation values were measured on a Perkin-Elmer 241 polarimeter.

Starting materials and reagents were purchased directly from commercial suppliers and used without further purifications. All solvents used as reaction medium were distilled before the use. The nitroalkenes **2**<sup>1</sup> and 4-nitro-5-styrylisoxazoles **3**<sup>2</sup> were synthesized using known literature procedures. The chiral squaramides **I** and **II** were also synthesized using known literature procedures.<sup>3</sup>

## General Procedure for the organocatalytic one-pot 1,4-/1,6-/1,2-addition reactions:

In a 10 mL round bottom flask equipped with a magnetic stirring bar, the nitroalkene **2** (1.0 equiv., 0.5 mmol) and catalyst **I** or **II** (1 mol%) were dissolved in  $\text{CH}_2\text{Cl}_2$  (1.00 mL) and stirred 5 minutes at room temperature followed by the addition of the  $\beta$ -keto ester **1** (1.0 equiv. 0.5 mmol). After stirring the reaction mixture at room temperature for 24 hours the 4-nitro-5-styrylisoxazoles **3** (2 equiv., 1.0 mmol) and DBU (30 mol%; 0.1 M in  $\text{CH}_2\text{Cl}_2$ ) were added subsequently and stirred for another 48 hours at room temperature. The crude product was directly purified by flash column chromatographies (first *n*-hexane/EtOAc = 9:1, then *n*-hexane/EtOAc = 4:1) to afford the polysubstituted cyclohexanes **4a-o**.

<sup>1</sup> (a) Organic Syntheses, Coll. Vol. 1, p.413 (1941); Vol. 9, p.66 (1929); (b) B. M. Trost and C. Müller, *J. Am. Chem. Soc.* 2008, **130**, 2438.

<sup>2</sup> (a) M. F. A. Adamo and E. F. Duffy, *Org. Lett.*, 2006, **8**, 5157; (b) J.-L. Zhang, X.-H. Liu, X.-J. Ma and R. Wang, *Chem. Commun.*, 2013, **49**, 9329.

<sup>3</sup> J. P. Malerich, K. Hagihara and V. H. Rawal, *J. Am. Chem. Soc.*, 2008, **130**, 14416.

## Analytic data:

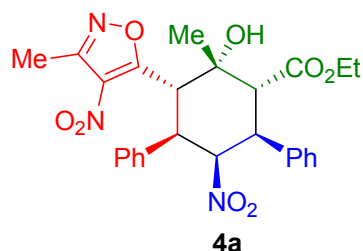

Compound **4a** was synthesized with catalyst **I** and isolated as a colorless solid (155 mg, 61%); Mp = 237-238 °C;  $[\alpha]_D^{24} = +58.0$  (c = 0.5, CHCl<sub>3</sub>); >20:1 dr; 98% ee (major diastereomer); HPLC (major diastereomer):  $t_R$  11.82 min (major), 17.25 min (minor), 214 nm, *n*-heptane/*i*-PrOH, 7:3, 1.00 mL/min, Chiralpak AD column; IR (capillary): 3526, 3064, 3032, 2985, 2903, 2650, 2326, 2226, 2162, 2109, 2071, 2009, 1958, 1898, 1816, 1730, 1595, 1546, 1513, 1445, 1417, 1371, 1343, 1316, 1252, 1216, 1175, 1140, 1077, 1022, 982, 926, 890, 830, 788, 748, 699 cm<sup>-1</sup>; <sup>1</sup>H NMR (600 MHz, CDCl<sub>3</sub>, major diastereomer):  $\delta$  = 7.32-7.27 (m, 3H, ArH), 7.25-7.24 (m, 2H, ArH), 7.18-7.16 (m, 3H, ArH), 7.12-7.11 (m, 2H, ArH), 5.44 (d,  $J$  = 13.2 Hz, 1H, CH), 5.04 (t,  $J$  = 4.2 Hz, 1H, CH), 4.46 (dd,  $J$  = 12.6, 4.2 Hz, 1H), 4.13-4.09 (m, 2H, 2CH), 3.99-3.92 (m, 2H, CH<sub>2</sub>), 3.91 (d,  $J$  = 6.8 Hz, 1H, OH), 2.42 (s, 3H, CH<sub>3</sub>), 1.34 (s, 3H, CH<sub>3</sub>), 0.91 (t,  $J$  = 6.0 Hz, 3H, CH<sub>3</sub>); <sup>13</sup>C NMR (151 MHz, CDCl<sub>3</sub>, major diastereomer):  $\delta$  = 174.2, 171.7, 155.0, 135.6, 135.3, 132.6, 129.4, 129.3, 129.0, 128.8, 128.7, 128.3, 127.3, 93.1, 71.9, 61.6, 50.0, 44.4, 44.1, 43.1, 26.9, 13.7, 11.8. ppm; MS (EI):  $m/z$  510.5 [M+1]<sup>+</sup>; HRMS Calcd for [C<sub>26</sub>H<sub>27</sub>N<sub>3</sub>O<sub>8</sub>+Na]<sup>+</sup>: 532.1690, found: 532.1690.

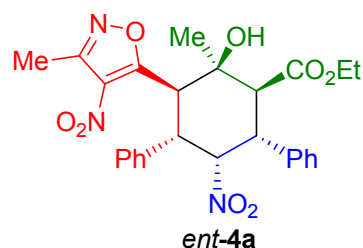

Compound **ent-4a** was synthesized with catalyst **II** and isolated as a colorless solid (151 mg, 60%); >20:1 dr; 96% ee (major diastereomer); HPLC (major diastereomer):  $t_R$  11.85 min (minor), 17.28 min (major), 214 nm, *n*-heptane/*i*-PrOH, 7:3, 1.00 mL/min, Chiralpak AD column.

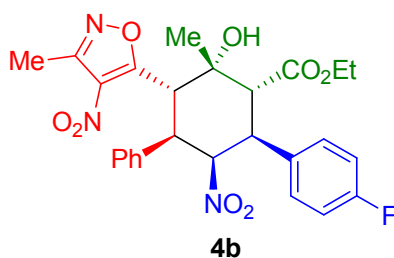

Compound **4b** synthesized with catalyst **I** and isolated as a colorless solid (168 mg, 64%); Mp = 196-198°C;  $[\alpha]_D^{24} = +60.0$  (c = 0.2, CHCl<sub>3</sub>); >20:1 dr; 99% ee (major diastereomer); HPLC (major diastereomer):  $t_R$  5.59 min (major), 12.60 min (minor), 230 nm, *n*-heptane/*i*-PrOH, 9:1, 0.70 mL/min, Chiralpak IC column; IR (capillary): 3791, 3493, 2981, 2673, 2325, 2097, 1999, 1901, 1720, 1599, 1517, 1365, 1231, 1168, 1023, 832, 758, 701 cm<sup>-1</sup>; <sup>1</sup>H NMR (400 MHz, CDCl<sub>3</sub>, major diastereomer):  $\delta$  = 7.26-7.17 (m, 5H, ArH), 7.11-7.09 (m, 2H, ArH), 7.03-6.99 (m, 2H, ArH), 5.42 (d,  $J$  = 12.8 Hz, 1H, CH), 5.00 (t,  $J$  = 4.0 Hz, 1H, CH), 4.44 (dd,  $J$  = 12.8, 4.5 Hz, 1H, CH), 4.08-4.07 (m, 2H, 2CH), 3.99-3.95 (m, 2H, CH<sub>2</sub>), 3.85 (s, 1H, OH), 2.42 (s, 3H, CH<sub>3</sub>), 1.33 (s, 3H, CH<sub>3</sub>), 0.96 (t,  $J$  = 7.1 Hz, 3H, CH<sub>3</sub>); <sup>13</sup>C NMR (101 MHz, CDCl<sub>3</sub>, major diastereomer):  $\delta$  = 174.0, 171.5, 162.9, 151.1, 135.5, 131.2, 130.1, 129.5, 128.8, 127.2, 116.1, 93.1, 71.9, 61.7, 50.2, 44.1, 43.6, 43.0, 26.8, 13.8, 11.8 ppm; <sup>19</sup>F NMR (376 MHz, CDCl<sub>3</sub>, major diastereomer):  $\delta$  = -112.8; MS (EI):  $m/z$  527.9 [M+1]<sup>+</sup>; HRMS Calcd for [C<sub>26</sub>H<sub>26</sub>N<sub>3</sub>O<sub>8</sub>F+H]<sup>+</sup>: 528.1777, found: 528.1786.

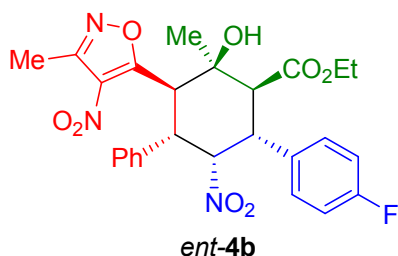

Compound **ent-4b** was synthesized with catalyst **II** and isolated as a colorless solid (165 mg, 63%); >20:1 dr; 97% ee (major diastereomer); HPLC (major diastereomer):  $t_R$  5.44 min (minor), 11.76 min (major), 230 nm, *n*-heptane/*i*-PrOH, 9:1, 0.70 mL/min, Chiralpak IC column.

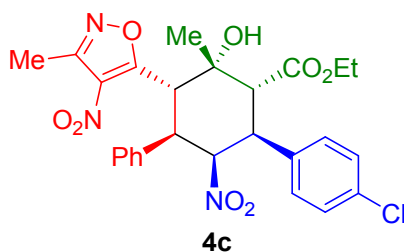

Compound **4c** was synthesized with catalyst **I** and isolated as a colorless solid (149 mg, 55%); Mp = 198-200°C;  $[\alpha]_D^{24} = +80.0$  (c = 0.5, CHCl<sub>3</sub>); >20:1 dr; 99% ee (major diastereomer); HPLC (major diastereomer):  $t_R$  5.52 min (major), 12.61 min (minor), 230 nm, *n*-heptane/*i*-PrOH, 9:1, 0.70 mL/min, Chiralpak-IC column; IR (capillary): 3786, 3529, 2929, 2670, 2318, 2105, 1992, 1913, 1728, 1600, 1542, 1366, 1252, 1153, 1093, 1020, 890, 828, 747, 702 cm<sup>-1</sup>; <sup>1</sup>H NMR (600 MHz, CDCl<sub>3</sub>, major diastereomer):  $\delta$  = 7.29-7.27 (m, 2H, ArH), 7.19-7.16 (m, 5H, ArH), 7.10-7.19 (m, 2H, ArH), 5.41 (d, *J* = 12.8 Hz, 1H, CH), 5.00 (t, *J* = 3.9 Hz, 1H, CH), 4.43 (dd, *J* = 12.8, 4.6 Hz, 1H), 4.07-4.06 (d, *J* = 5.4 Hz, 2H, 2CH), 4.00-3.96 (m, 2H, CH<sub>2</sub>), 3.81 (br s, 1H, OH), 2.41 (s, 3H, CH<sub>3</sub>), 1.32 (s, 3H, CH<sub>3</sub>), 0.97 (t, *J* = 7.1 Hz, 3H, CH<sub>3</sub>); <sup>13</sup>C NMR (151 MHz, CDCl<sub>3</sub>, major diastereomer):  $\delta$  = 173.9, 171.5, 155.1, 135.4, 134.8, 133.9, 132.5, 129.6, 129.5, 129.4, 128.8, 127.2, 92.9, 71.9, 61.8, 49.9, 44.0, 43.7, 43.0, 26.8, 13.9, 11.8 ppm; MS (EI): *m/z* 543.1[M]<sup>+</sup>; HRMS Calcd for [C<sub>26</sub>H<sub>26</sub>N<sub>3</sub>O<sub>8</sub>Cl+H]<sup>+</sup>: 544.1481, found: 544.1482.

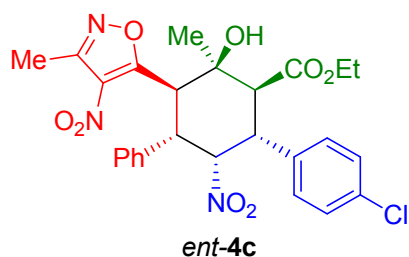

Compound **ent-4c** was synthesized with catalyst **II** and isolated as a colorless solid (139 mg, 51%); >20:1 dr; 95% ee (major diastereomer); HPLC (major diastereomer):  $t_R$  5.51 min (minor), 12.72 min (major), 230 nm, *n*-heptane/*i*-PrOH, 9:1, 0.70 mL/min, Chiralpak-IC column.

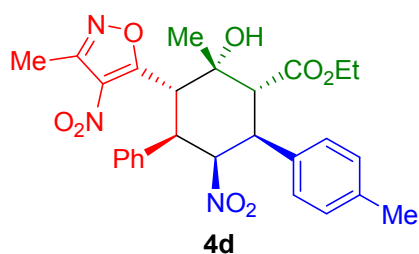

Compound **4d** synthesized with catalyst **I** and isolated as a colorless solid (165 mg, 63%); Mp = 212-213°C;  $[\alpha]_D^{24} = +54.4$  (c = 0.5, CHCl<sub>3</sub>); >20:1 dr; 93% ee (major diastereomer); HPLC (major diastereomer):  $t_R$  20.24 min (major), 31.66 min (minor), 254nm, *n*-heptane/*i*-

PrOH, 7:3, 0.70 mL/min, Chiralpak-AD column; IR (capillary): 3788, 3488, 2980, 2669, 2323, 2105, 2000, 1905, 1722, 1597, 1530, 1443, 1365, 1259, 1178, 1023, 892, 827, 747, 702  $\text{cm}^{-1}$ ;  $^1\text{H}$  NMR (600 MHz,  $\text{CDCl}_3$ , major diastereomer):  $\delta = 7.18\text{-}7.16$  (m, 3H, ArH), 7.12-7.09 (m, 6H, ArH), 5.42 (d,  $J = 12.6$  Hz, 1H, CH), 5.01 (t,  $J = 4.5$  Hz, 1H, CH), 4.43 (dd,  $J = 12.6, 4.8$  Hz, 1H, CH), 4.10-4.02 (m, 2H, 2CH), 3.99-3.92 (m, 2H,  $\text{CH}_2$ ), 3.90 (s, 1H, OH), 2.42 (s, 3H,  $\text{CH}_3$ ), 2.29 (s, 3H,  $\text{CH}_3$ ), 1.32 (s, 3H,  $\text{CH}_3$ ), 0.94 (t,  $J = 7.2$  Hz, 3H,  $\text{CH}_3$ );  $^{13}\text{C}$  NMR (151 MHz,  $\text{CDCl}_3$ , major diastereomer):  $\delta = 174.2, 171.7, 155.0, 138.5, 135.7, 132.5, 132.2, 129.7, 129.4, 129.3, 128.64, 128.1, 127.2, 93.3, 71.9, 61.6, 50.0, 44.0, 43.9, 43.1, 26.9, 21.2, 13.8, 11.8$  ppm; MS (EI):  $m/z$  523.0  $[\text{M}]^+$ ; HRMS Calcd for  $[\text{C}_{27}\text{H}_{29}\text{N}_3\text{O}_8+\text{Na}]^+$ : 546.1847, found: 546.1846.

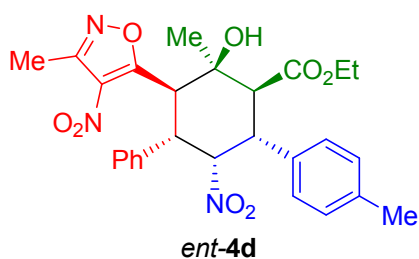

Compound **ent-4d** was synthesized with catalyst **II** and isolated as a colorless solid (168 mg, 64%); >20:1 dr; 98% ee (major diastereomer); HPLC (major diastereomer):  $t_R$  31.55 min (minor), 20.31 min (major), 254 nm, *n*-heptane/*i*-PrOH, 7:3, 0.70 mL/min, Chiralpak-AD column.

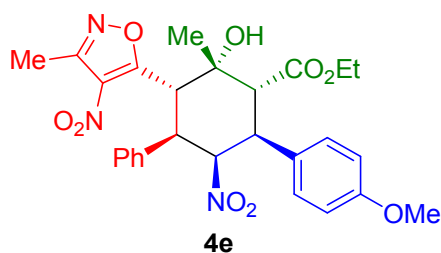

Compound **4e** was synthesized with catalyst **I** and isolated as a colorless solid (180 mg, 67%); Mp = 109-110°C;  $[\alpha]_D^{24} = +64.4$  ( $c = 0.5, \text{CHCl}_3$ ); >20:1 dr; 97% ee (major diastereomer); HPLC (major diastereomer):  $t_R$  36.31 min (major), 54.49 min (minor), 230 nm, *n*-heptane/ethanol, 9:1, 1.00 mL/min, Chiralpak IA column; IR (capillary): 3790, 3487, 2977, 2670, 2324, 2099, 1999, 1896, 1723, 1598, 1517, 1450, 1365, 1253, 1180, 1027, 893, 830, 756, 702  $\text{cm}^{-1}$ ;  $^1\text{H}$  NMR (400 MHz,  $\text{CDCl}_3$ , major diastereomer):  $\delta = 7.18\text{-}7.15$  (m, 5H, ArH), 7.11-7.10 (m, 2H, ArH), 6.82 (d,  $J = 8.6$  Hz, 2H, ArH), 5.41 (d,  $J = 12.7$  Hz, 1H, CH),

5.00 (t,  $J = 4.2$  Hz, 1H, CH), 4.42 (dd,  $J = 12.8, 4.5$  Hz, 1H, CH), 4.08-4.03 (m, 2H, 2CH), 3.98-3.95 (m, 2H, CH<sub>2</sub>), 3.91 (s, 1H, OH), 3.76 (s, 3H, CH<sub>3</sub>), 2.42 (s, 3H, CH<sub>3</sub>), 1.32 (s, 3H, CH<sub>3</sub>), 0.95 (t,  $J = 7.1$  Hz, 3H, CH<sub>3</sub>); <sup>13</sup>C NMR (101 MHz, CDCl<sub>3</sub>, major diastereomer):  $\delta = 174.22, 171.7, 159.8, 155.0, 153.7, 135.7, 132.5, 129.4, 128.6, 127.2, 114.4, 93.3, 71.9, 61.6, 55.3, 50.2, 44.0, 43.6, 43.0, 26.9, 13.9, 11.8$  ppm; MS (ED):  $m/z$  539.1 [M]<sup>+</sup>; HRMS Calcd for [C<sub>27</sub>H<sub>29</sub>N<sub>3</sub>O<sub>9</sub>+Na]<sup>+</sup>: 562.1796, found: 562.1803.

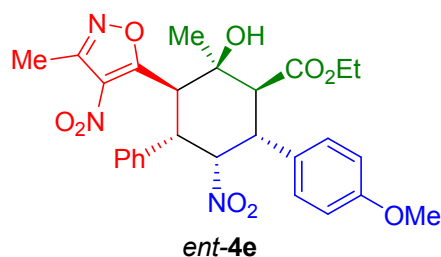

Compound *ent-4e* was synthesized with catalyst **II** and isolated as a colorless solid (177 mg, 66%); >20:1 dr; 95% ee (major diastereomer); HPLC (major diastereomer):  $t_R$  36.35 min (minor), 54.29 min (major), 230 nm, *n*-heptane/ethanol, 9:1, 1.00 mL/min, Chiralpak IA column.

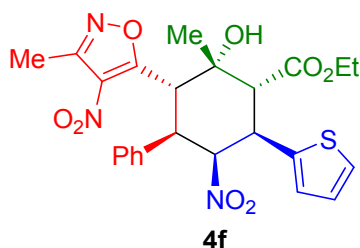

Compound **4f** was synthesized with catalyst **I** and isolated as a colorless solid (158 mg, 61%); Mp = 232-233 °C;  $[\alpha]_D^{24} = +73.8$  ( $c = 0.5, \text{CHCl}_3$ ); >20:1 dr; 91% ee (major diastereomer); HPLC (major diastereomer):  $t_R$  6.91 min (major) 13.99 min (minor), 230 nm, *n*-heptane/*i*-PrOH, 9:1, 0.7 mL/min, Chiralpak IC column; IR (capillary): 3532, 3110, 2985, 2651, 2323, 2182, 2068, 1998, 1953, 1899, 1811, 1730, 1598, 1551, 1517, 1444, 1418, 1370, 1344, 1245, 1212, 1179, 1141, 1023, 982, 926, 888, 830, 760, 703 cm<sup>-1</sup>; <sup>1</sup>H NMR (400 MHz, CDCl<sub>3</sub>, major diastereomer):  $\delta = 7.22-7.09$  (m, 6H, ArH), 6.96-6.92 (m, 2H, ArH), 5.38 (d,  $J = 12.8$  Hz, 1H, CH), 5.09 (t,  $J = 4.4$  Hz, 1H, CH), 4.46-4.34 (m, 2H, 2CH), 4.10-3.98 (m, 3H, CH, CH<sub>2</sub>), 3.83 (s, 1H, OH), 2.41 (s, 3H, CH<sub>3</sub>), 1.32 (s, 3H, CH<sub>3</sub>), 1.01 (t,  $J = 7.1$  Hz, 3H, CH<sub>3</sub>); <sup>13</sup>C NMR (101 MHz, CDCl<sub>3</sub>, major diastereomer):  $\delta = 173.8, 171.5, 155.0, 137.2, 135.5, 132.6, 129.5, 128.7, 127.4, 127.2, 126.8, 125.7, 93.2, 71.9, 61.8, 51.6, 43.8, 43.0, 39.4,$

26.7, 13.8, 11.8 ppm; MS (EI):  $m/z$  516.1  $[M+H]^+$ ; HRMS Calcd for  $[C_{24}H_{25}N_3O_8S + Na]^+$ : 538.1255, found: 538.1251.

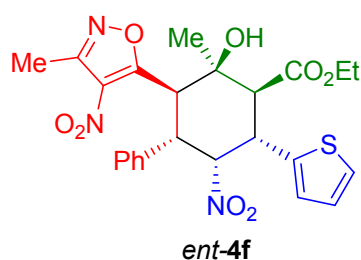

Compound *ent*-**4f** was synthesized with catalyst **II** and isolated as a colorless solid (152 mg, 59%); >20:1 dr; 96% ee (major diastereomer); HPLC (major diastereomer):  $t_R$  6.94 min (minor), 13.94 min (major), 230 nm, *n*-heptane/*i*-PrOH, 9:1, 0.7 mL/min, Chiralpak IC column.

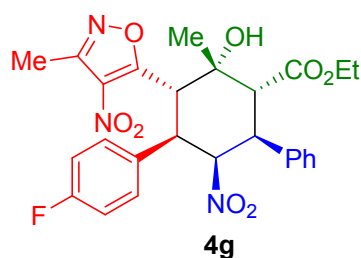

Compound **4g** was synthesized with catalyst **I** and isolated as a colorless solid (160 mg, 60%); Mp = 201-203°C;  $[\alpha]_D^{24} = +52.0$  ( $c = 0.5$ , CHCl<sub>3</sub>); >20:1 dr; 98% ee (major diastereomer); HPLC (major diastereomer):  $t_R$  14.06 min (major), 17.91 min (minor), 214 nm, *n*-heptane/*i*-PrOH, 7:3, 1.00 mL/min, Chiralcel AD column; IR (capillary): 3790, 3491, 2982, 2671, 2322, 2087, 1899, 1719, 1597, 1524, 1364, 1172, 1024, 831, 761, 701 cm<sup>-1</sup>; <sup>1</sup>H NMR (400 MHz, CDCl<sub>3</sub>, major diastereomer):  $\delta = 7.31$ -7.29 (m, 3H, ArH), 7.24-7.23 (m, 2H, ArH), 7.12-7.09 (m, 2H, ArH), 6.90-6.86 (m, 2H, ArH), 5.38 (dd,  $J = 12.8, 1.4$  Hz, 1H, CH), 5.01-4.99 (m, 1H, CH), 4.44 (dd,  $J = 12.8, 4.5$  Hz, 1H, CH), 4.08-4.07 (m, 2H, 2CH), 3.97-3.91 (m, 3H, OH, CH<sub>2</sub>); 2.44 (s, 3H, CH<sub>3</sub>), 1.32 (s, 3H, CH<sub>3</sub>), 0.90 (t,  $J = 7.1$  Hz, 3H, CH<sub>3</sub>); <sup>13</sup>C NMR (151 MHz, CDCl<sub>3</sub>, major diastereomer):  $\delta = 174.1, 171.4, 162.6, 155.1, 135.1, 132.6, 131.5, 129.3, 128.9, 128.3, 127.8, 116.5, 93.0, 71.9, 61.7, 49.9, 44.3, 43.3$  (2C), 26.8, 13.7, 11.8 ppm; <sup>19</sup>F NMR (376 MHz, CDCl<sub>3</sub>, major diastereomer):  $\delta = -112.6$ ; MS (EI):  $m/z$  528.0  $[M+1]^+$ ; HRMS Calcd for  $[C_{26}H_{26}N_3O_8F + Na]^+$ : 550.1596, found: 550.1597.



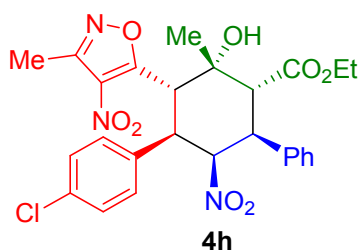

Compound **4h** was synthesized with catalyst **I** and isolated as a colorless solid (167 mg, 61%); Mp = 192-193 °C;  $[\alpha]_D^{24} = +57.6$  (c = 0.5, CHCl<sub>3</sub>); >20:1 dr; 97% ee (major diastereomer); HPLC (major diastereomer):  $t_R$  14.27 min (major), 18.99 min (minor), 230 nm, *n*-heptane/*i*-PrOH, 7:3, 1.00 mL/min, Chiralpak AD column; IR (capillary): 3498, 3066, 3034, 2981, 2938, 26.53, 2507, 2324, 2226, 2161, 2069, 1989, 1954, 1903, 1706, 1597, 1550, 1522, 1451, 1414, 1368, 1261, 1187, 1094, 1015, 893, 827, 795, 755, 697 cm<sup>-1</sup>; <sup>1</sup>H NMR (600 MHz, CDCl<sub>3</sub>, major diastereomer):  $\delta = 7.32$ -7.27 (m, 3H, ArH), 7.24-7.22 (m, 2H, ArH), 7.17-7.16 (m, 2H, ArH), 7.07-7.05 (m, 2H, ArH), 5.38 (dd,  $J = 12.8, 1.3$  Hz, 1H, CH), 4.98 (t,  $J = 3.9$  Hz, 1H, CH), 4.44 (dd,  $J = 12.8, 4.5$  Hz, 1H), 4.07-4.06 (m, 2H, 2CH), 3.98-3.90 (m, 3H, CH<sub>2</sub>, OH), 2.46 (s, 3H, CH<sub>3</sub>), 1.32 (s, 3H, CH<sub>3</sub>), 0.90 (t,  $J = 7.1$  Hz, 3H, CH<sub>3</sub>); <sup>13</sup>C NMR (151 MHz, CDCl<sub>3</sub>, major diastereomer):  $\delta = 174.1, 171.3, 155.2, 135.1, 134.6, 134.2, 132.6, 129.7, 129.1, 128.9, 128.7, 128.3, 127.8, 92.9, 71.9, 61.7, 49.9, 44.3, 43.4, 43.1, 26.8, 13.7, 11.9$  ppm; MS (EI):  $m/z$  544.1 [M+1]<sup>+</sup>; Anal. Calcd for C<sub>26</sub>H<sub>26</sub>N<sub>3</sub>O<sub>8</sub>Cl: C, 57.41; H, 4.82; N, 7.72, found: C, 57.11; H, 4.88; N 7.45.

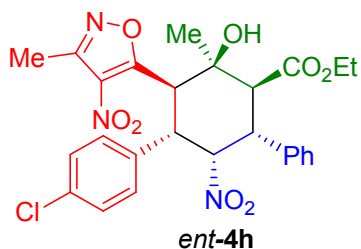

Compound **ent-4h** was synthesized with catalyst **II** and isolated as a colorless solid (164 mg, 60%); 20:1 dr; 97% ee (major diastereomer); HPLC (major diastereomer):  $t_R$  14.28 min (minor), 19.05 min (major), 230 nm, *n*-heptane/*i*-PrOH, 7:3, 1.00 mL/min, Chiralpak AD column.

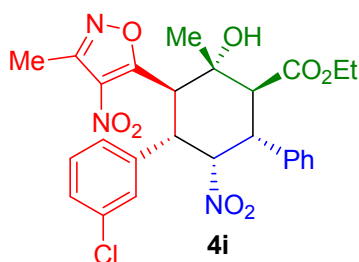

Compound **4i** was synthesized with catalyst **I** and isolated as a colorless solid (189 mg, 69%); Mp = 216-218 °C;  $[\alpha]_D^{24} = +68.0$  (c = 0.2, CHCl<sub>3</sub>); >20:1 dr; 97% ee (major diastereomer); HPLC (major diastereomer):  $t_R$  10.16 min (major), 19.54 min (minor), 230 nm, *n*-heptane/EtOH, 9:1, 1.00 mL/min, Chiralcel OD column; IR (capillary): 3578, 2978, 2679, 2326, 2100, 1996, 1897, 1718, 1596, 1543, 1364, 1255, 1028, 898, 829, 760, 697 cm<sup>-1</sup>; <sup>1</sup>H NMR (600 MHz, CDCl<sub>3</sub>, major diastereomer):  $\delta = 7.33$ -7.27 (m, 3H, ArH), 7.24-7.22 (m, 2H, ArH), 7.17-7.14 (m, 2H, ArH), 7.12-7.10 (m, 1H, ArH), 6.97 (d,  $J = 7.7$  Hz, 1H, ArH), 5.40 (dd,  $J = 12.8, 1.6$  Hz, 1H, CH), 5.03-5.02 (m, 1H, CH), 4.44 (dd,  $J = 12.8, 4.5$  Hz, 1H, CH), 4.08-4.07 (m, 2H, 2CH), 3.99-3.90 (m, 3H, CH<sub>2</sub>, OH), 2.45 (s, 3H, CH<sub>3</sub>), 1.32 (s, 3H, CH<sub>3</sub>), 0.90 (t,  $J = 7.1$  Hz, 3H, CH<sub>3</sub>); <sup>13</sup>C NMR (151 MHz, CDCl<sub>3</sub>, major diastereomer):  $\delta = 174.1, 171.2, 155.2, 137.6, 135.2, 135.0, 132.6, 130.7, 129.2, 129.1, 128.9, 128.3, 127.8, 124.7, 92.8, 71.9, 61.7, 49.9, 44.3, 43.8, 42.9, 26.8, 13.7, 11.8$  ppm; MS (EI):  $m/z$  543.0 [M]<sup>+</sup>; HRMS Calcd for [C<sub>26</sub>H<sub>26</sub>N<sub>3</sub>O<sub>8</sub>Cl+Na]<sup>+</sup>: 566.1301, found: 566.1301.

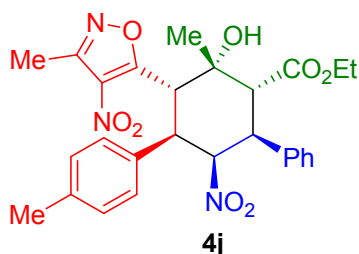

Compound **4j** was synthesized with catalyst **I** and isolated as a colorless solid (190 mg, 73%); Mp = 186-188 °C;  $[\alpha]_D^{24} = +57.6$  (c = 0.5, CHCl<sub>3</sub>); >20:1 dr; 98% ee (major diastereomer); HPLC (major diastereomer):  $t_R$  10.22 min (major), 18.64 min (minor), 254 nm, *n*-heptane/EtOH, 9:1, 1.00 mL/min, Chiralcel OD column; IR (capillary): 3506, 2980, 2933, 2735, 2651, 2509, 2323, 2230, 2176, 2112, 2067, 2014, 1983, 1951, 1808, 1712, 1597, 1551, 1519, 1452, 1417, 1370, 1260, 1183, 1111, 1023, 978, 895, 827, 792, 754, 700 cm<sup>-1</sup>; <sup>1</sup>H NMR (600 MHz, CDCl<sub>3</sub>, major diastereomer):  $\delta = 7.31$ -7.23 (m, 6H, ArH), 6.99-6.95 (m, 3H, ArH), 5.41 (dd,  $J = 12.8, 1.4$  Hz, 1H, CH), 5.01 (t,  $J = 4.3$  Hz, 1H, CH), 4.40 (dd,  $J = 12.8, 4.6$  Hz, 1H, CH), 4.11-4.07 (m, 2H, 2CH), 3.98-3.89 (m, 3H, CH<sub>2</sub>, OH), 2.43 (s, 3H,

CH<sub>3</sub>), 2.20 (s, 3H, CH<sub>3</sub>), 1.33 (s, 3H, CH<sub>3</sub>), 0.90 (t, *J* = 7.1 Hz, 3H, CH<sub>3</sub>); <sup>13</sup>C NMR (151 MHz, CDCl<sub>3</sub>, major diastereomer): δ = 174.2, 171.8, 155.0, 138.4, 135.3, 132.5, 130.1, 130.0, 129.1, 128.8, 128.3, 127.8, 127.0, 93.2, 71.9, 61.6, 49.9, 44.3, 43.6, 43.1, 26.9, 21.2, 13.7, 11.9 ppm; MS (EI): *m/z* 523.1 [M]<sup>+</sup>; Anal. Calcd for C<sub>27</sub>H<sub>29</sub>N<sub>3</sub>O<sub>8</sub>: C, 61.94; H, 5.58; N, 8.03, found: C, 61.70; H, 5.94; N 7.65.

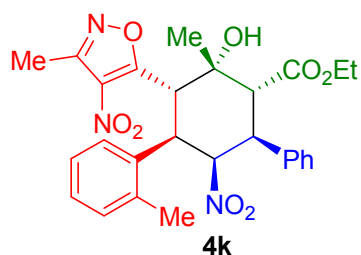

Compound **4k** was synthesized with catalyst **I** and isolated as a colorless solid (128 mg, 49%); Mp = 180-182 °C; [α]<sub>D</sub><sup>24</sup> = +45.0 (c = 0.2, CHCl<sub>3</sub>); >20:1 dr; 95% ee (major diastereomer); HPLC (major diastereomer): t<sub>R</sub> 5.14 min (major), 13.93 min (minor), 230 nm, *n*-heptane/*i*-PrOH, 9:1, 0.70 mL/min, Chiralpak IC column; IR (capillary): 3788, 2523, 2979, 2669, 2323, 2083, 1989, 1902, 1723, 1598, 1545, 1444, 1364, 1253, 1164, 1026, 890, 829, 752, 699 cm<sup>-1</sup>; <sup>1</sup>H NMR (600 MHz, CDCl<sub>3</sub>, major diastereomer): δ = 7.32-7.28 (m, 3H, ArH), 7.25-7.24 (m, 2H, ArH), 7.08-7.02 (m, 2H, ArH), 6.97-6.91 (m, 2H, ArH), 5.43 (dd, *J* = 12.7, 1.6 Hz, 1H, CH), 4.96-4.95 (m, 1H, CH), 4.72 (dd, *J* = 12.7, 4.5 Hz, 1H, CH), 4.15 (d, *J* = 12.8 Hz, 1H, CH), 4.05 (dd, *J* = 12.8, 4.4 Hz, 1H, CH), 3.99-3.91 (m, 2H, CH<sub>2</sub>), 3.87 (d, *J* = 1.6 Hz, 1H, OH), 2.45 (s, 3H, CH<sub>3</sub>), 2.41 (s, 3H, CH<sub>3</sub>), 1.34 (s, 3H, CH<sub>3</sub>), 0.91 (t, *J* = 7.1 Hz, 3H, CH<sub>3</sub>); <sup>13</sup>C NMR (151 MHz, CDCl<sub>3</sub>, major diastereomer): δ = 174.2, 171.9, 155.1, 136.1, 135.3, 133.5, 132.5, 131.3, 129.6, 129.1, 128.8, 128.4, 128.3, 128.0, 127.1, 125.0, 91.1, 72.0, 61.6, 50.1, 44.6, 43.4, 39.1, 27.0, 19.7, 13.8, 11.8 ppm; MS (EI): *m/z* 523.0 [M]<sup>+</sup>; HRMS Calcd for [C<sub>27</sub>H<sub>29</sub>N<sub>3</sub>O<sub>8</sub>+Na]<sup>+</sup>: 546.1847, found: 546.1846.

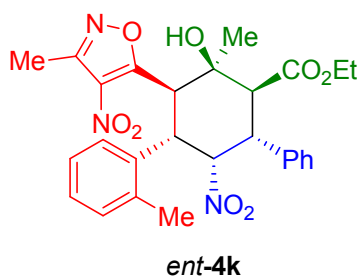

Compound **ent-4k** was synthesized with catalyst **II** and isolated as a colorless solid (132 mg, 50%); >20:1 dr; 96% ee (major diastereomer); HPLC (major diastereomer): t<sub>R</sub> 5.14 min

(minor), 13.63 min (minor), 230 nm, *n*-heptane/*i*-PrOH, 9:1, 0.70 mL/min, Chiralpak IC column.

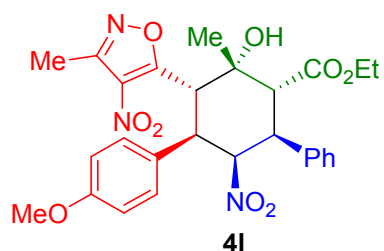

Compound **4l** was synthesized with catalyst **I** and isolated as a colorless solid (105 mg, 39%); Mp = 110-112 °C;  $[\alpha]_D^{24} = +62.8$  (c = 0.5, CHCl<sub>3</sub>); >20:1 dr; 96% ee (major diastereomer); HPLC (major diastereomer):  $t_R$  15.96 min (major), 23.00 min (minor), 214 nm, *n*-heptane/*i*-PrOH, 7:3, 1.00 mL/min, Chiralpak AD column; IR (capillary): 3786, 3474, 2971, 2682, 2322, 2115, 1999, 1927, 1731, 1598, 1523, 1445, 1365, 1248, 1186, 1024, 894, 828, 759, 700 cm<sup>-1</sup>; <sup>1</sup>H NMR (600 MHz, CDCl<sub>3</sub>, major diastereomer):  $\delta = 7.31$ -7.22 (m, 5H, ArH), 7.03 (d,  $J = 8.7$  Hz, 2H, ArH), 6.69 (d,  $J = 8.9$  Hz, 2H, ArH), 5.38 (dd,  $J = 12.8$ , 1.6 Hz, 1H, CH), 5.00 (t,  $J = 4.3$  Hz, 1H, CH), 4.38 (dd,  $J = 12.8$ , 4.6 Hz, 1H, CH), 4.09-4.07 (m, 2H, 2CH), 3.96-3.89 (m, 3H, CH<sub>2</sub>, OH), 3.69 (s, 3H, CH<sub>3</sub>), 2.43 (s, 3H, CH<sub>3</sub>), 1.32 (s, 3H, CH<sub>3</sub>), 0.90 (t,  $J = 7.1$  Hz, 3H, CH<sub>3</sub>); <sup>13</sup>C NMR (151 MHz, CDCl<sub>3</sub>, major diastereomer):  $\delta = 174.2$ , 171.8, 159.5, 155.1, 135.3, 132.5, 129.2, 129.1, 128.8, 128.4, 128.3, 127.9, 127.8, 127.5, 114.7, 93.3, 71.9, 61.6, 55.2, 49.9, 44.3, 43.3, 43.2, 26.9, 13.7, 11.9 ppm; MS (EI):  $m/z$  539.0 [M]<sup>+</sup>; HRMS Calcd for [C<sub>27</sub>H<sub>29</sub>N<sub>3</sub>O<sub>9</sub>+Na]<sup>+</sup>: 562.1796, found: 562.1796.

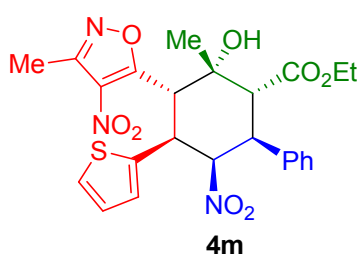

Compound **4m** was synthesized with catalyst **I** and isolated as a colorless solid (128 mg, 50%); Mp = 230-232°C;  $[\alpha]_D^{24} = +79.8$  (c = 0.5, CHCl<sub>3</sub>); >20:1 dr; 97% ee (major diastereomer); HPLC (major diastereomer):  $t_R$  7.47 min (major), 16.39 min (minor), 214 nm, *n*-heptane/*i*-PrOH, 9:1, 0.70 mL/min, Chiralpak IC column; IR (capillary): 3787, 3483, 2981, 2666, 2318, 2080, 1987, 1721, 1599, 1537, 1364, 1257, 1196, 1024, 832, 704 cm<sup>-1</sup>; <sup>1</sup>H NMR (600 MHz, CDCl<sub>3</sub>, major diastereomer):  $\delta = 7.33$ -7.29 (m, 3H, ArH), 7.24-7.22 (m, 2H, ArH), 7.08 (dd,  $J = 4.9$ , 0.9 Hz, 1H, ArH), 6.79-6.76 (m, 2H, ArH), 5.40 (dd,  $J = 12.6$ , 1.6

Hz, 1H, CH), 5.10-5.09 (m, 1H, CH), 4.71 (dd,  $J = 12.6, 4.6$  Hz, 1H, CH), 4.06-4.05 (m, 2H, 2CH), 4.98-3.90 (m, 3H, CH<sub>2</sub>, OH), 2.46 (s, 3H, CH<sub>3</sub>), 1.32 (s, 3H, CH<sub>3</sub>), 0.90 (t,  $J = 7.1$  Hz, 3H, CH<sub>3</sub>); <sup>13</sup>C NMR (151 MHz, CDCl<sub>3</sub>, major diastereomer):  $\delta = 174.1, 171.4, 155.2, 137.6, 135.1, 132.7, 131.0, 129.1, 128.9, 128.2, 127.5, 125.9, 125.8, 93.2, 71.9, 61.6, 49.8, 44.8, 44.1, 39.3, 26.8, 13.7, 11.9$ ; MS (EI):  $m/z$  516.0 [M+1]<sup>+</sup>; HRMS Calcd for [C<sub>24</sub>H<sub>25</sub>N<sub>3</sub>O<sub>8</sub>S+Na]<sup>+</sup>: 538.1255, found: 538.1255.

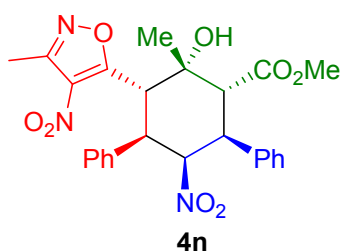

Compound **4n** was synthesized with catalyst **I** and isolated as a colorless solid (145 mg, 58%); Mp = 236-238 °C;  $[\alpha]_D^{24} = +79.8$  (c = 0.5, CHCl<sub>3</sub>); >20:1 dr; 97% ee (major diastereomer); HPLC (major diastereomer):  $t_R$  5.58 min (major), 8.13 min (minor), 230 nm, *n*-heptane/EtOH, 9:1, 0.70 mL/min, Chiralpak-IC column; IR (capillary): 3782, 3704, 3514, 3254, 2953, 2648, 2514, 2326, 2226, 2160, 2101, 2066, 1990, 1950, 1905, 1710, 1597, 1551, 1518, 1433, 1357, 1262, 1202, 1163, 1074, 1009, 957, 919, 890, 861, 827, 789, 750, 700 cm<sup>-1</sup>; <sup>1</sup>H NMR (400 MHz, CDCl<sub>3</sub>, major diastereomer):  $\delta = 7.32-7.27$  (m, 3H, ArH), 7.25-7.23 (m, 2H, ArH), 7.19-7.16 (m, 3H, ArH), 7.13-7.11 (m, 2H, ArH), 5.45 (d,  $J = 12.8$  Hz, 1H, CH), 5.05 (t,  $J = 4.3$  Hz, 1H, CH), 4.47 (dd,  $J = 12.8, 4.5$  Hz, 1H), 4.19-4.10 (m, 2H, 2CH), 3.74 (br s, 1H), 3.49 (s, 3H, CH<sub>3</sub>), 2.43 (s, 3H, CH<sub>3</sub>), 1.34 (s, 3H, CH<sub>3</sub>); <sup>13</sup>C NMR (101 MHz, CDCl<sub>3</sub>, major diastereomer):  $\delta = 174.5, 171.6, 155.1, 135.5, 135.3, 132.5, 129.4, 129.2, 128.9, 128.8, 128.7, 128.0, 127.2, 93.1, 71.9, 52.3, 50.0, 44.2, 44.0, 43.1, 26.9, 11.8$  ppm; MS (EI):  $m/z$  495.9 [M]<sup>+</sup>; Anal. Calcd for C<sub>25</sub>H<sub>25</sub>N<sub>3</sub>O<sub>8</sub>: C, 60.60; H, 5.09; N, 8.48, found: C, 60.60; H, 5.37; N 8.12.

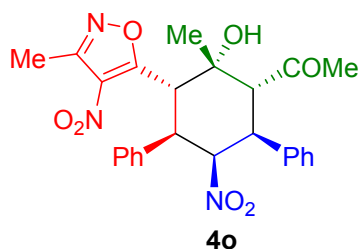

Compound **4a** was synthesized with catalyst **I** and isolated as a colorless solid (120 mg, 50%); Mp = 244-245 °C;  $[\alpha]_D^{24} = +68.0$  (c = 0.5, CHCl<sub>3</sub>); >20:1 dr; 96% ee (major diastereomer); HPLC (major diastereomer):  $t_R$  12.77 min (major), 25.18 min (minor), 214

nm, *n*-heptane/EtOH, 97:3, 0.70 mL/min, Chiralpak IC column; IR (capillary): 3575, 3484, 2981, 2920, 2321, 2153, 2065, 1992, 1954, 1898, 1700, 1596, 1549, 1520, 1452, 1417, 1360, 1255, 1204, 1141, 1076, 1032, 996, 953, 894, 854, 828, 759, 700 cm<sup>-1</sup>; <sup>1</sup>H NMR (400 MHz, CDCl<sub>3</sub>, major diastereomer): δ = 7.33-7.29 (m, 3H, ArH), 7.23-7.16 (m, 5H, ArH), 7.12-7.09 (m, 2H, ArH), 5.46 (d, *J* = 12.8 Hz, 1H, CH), 5.00 (t, *J* = 4.5 Hz, 1H, CH), 4.44 (dd, *J* = 12.8, 4.5 Hz, 1H, CH), 4.38 (d, *J* = 12.6 Hz, 1H, CH), 4.03-4.00 (m, 2H, CH, OH), 2.42 (s, 3H, CH<sub>3</sub>), 2.09 (s, 3H, CH<sub>3</sub>), 1.31 (s, 3H, CH<sub>3</sub>); <sup>13</sup>C NMR (101 MHz, CDCl<sub>3</sub>, major diastereomer): δ = 214.5, 171.7, 155.0, 135.6, 135.5, 132.7, 129.6, 129.4, 129.1, 128.7, 128.1, 127.2, 93.2, 72.6, 54.40, 44.7, 44.1, 43.4, 35.2, 26.9, 11.8 ppm; *m/z* 480 [M+1]<sup>+</sup>; HRMS Calcd for [C<sub>25</sub>H<sub>25</sub>N<sub>3</sub>O<sub>7</sub>+H]<sup>+</sup>: 480.1765, found: 480.1769.

### **Procedure for the gram-scale organocatalytic one-pot 1,4-1,6-/1,2-addition reaction:**

In a 100 mL round bottom flask equipped with a magnetic stirring bar, the nitroalkene **2a** (1.0 equiv., 8.0 mmol) and catalyst **I** (0.5 mol%) were dissolved in CH<sub>2</sub>Cl<sub>2</sub> (10 mL) and stirred 5 minutes at room temperature followed by the addition of ethyl acetoacetate (1.0 equiv. 8.0 mmol). After stirring the reaction mixture at room temperature for 48 hours the 4-nitro-5-styrylisoxazole **3a** (2 equiv., 16 mmol) and DBU (30 mol%; 0.1 M in CH<sub>2</sub>Cl<sub>2</sub>) were added subsequently and stirred for another 48 hours at room temperature. The crude product was directly purified by flash column chromatography (first *n*-hexane/EtOAc = 9:1, then *n*-hexane/EtOAc = 4:1) to afford 2.34 g (57% yield) of the polysubstituted cyclohexane **4a**.

# NMR Spectra:

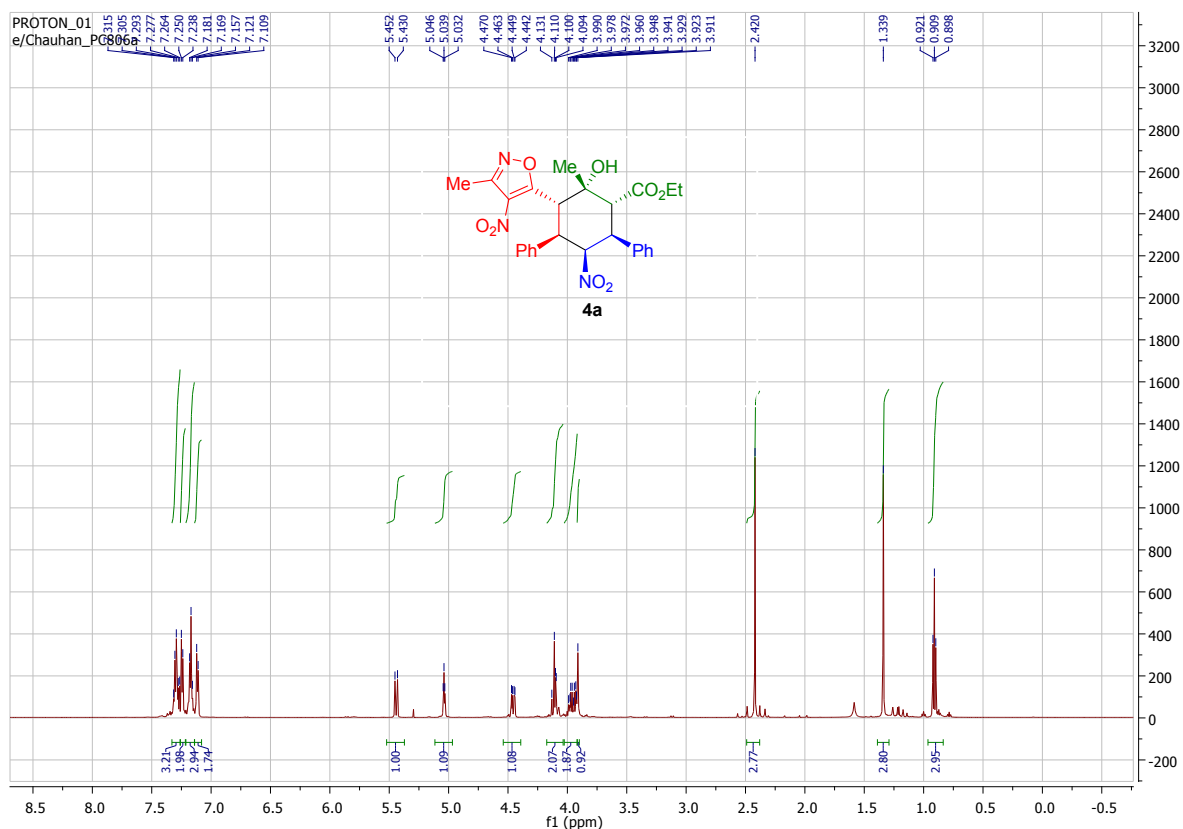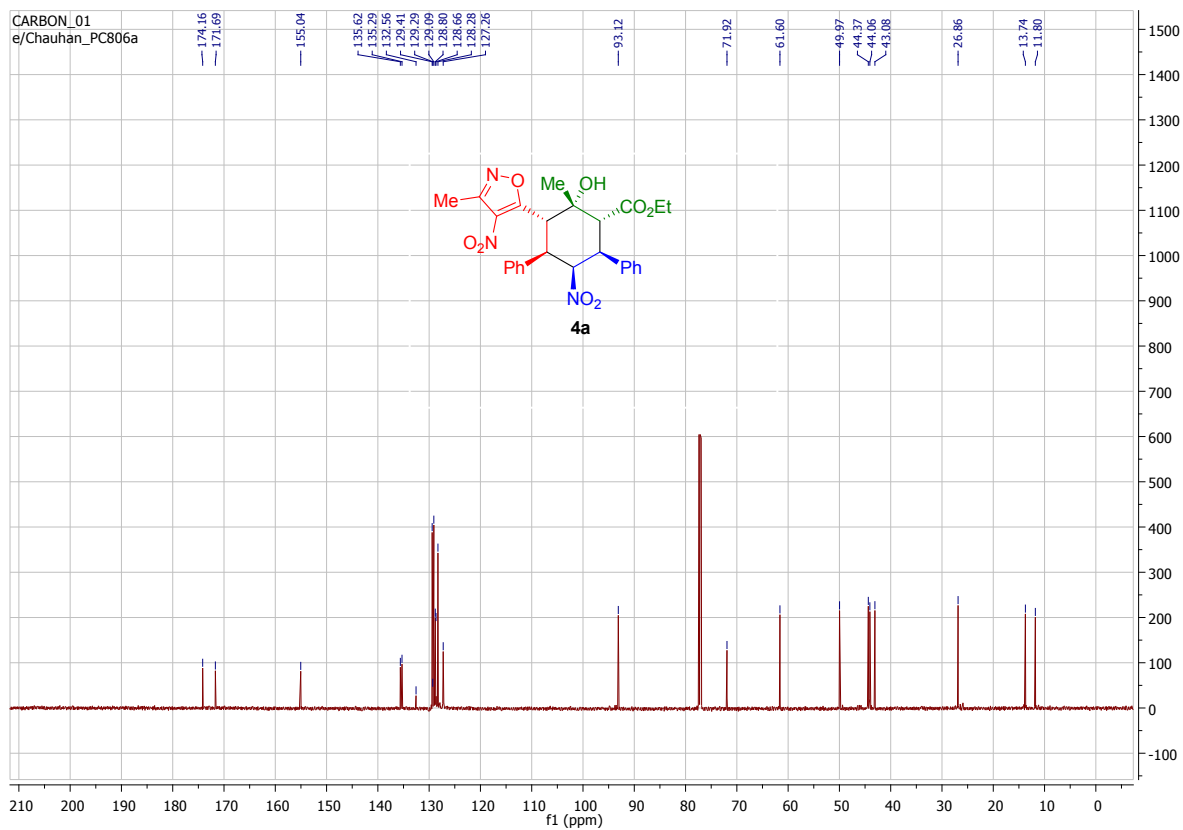

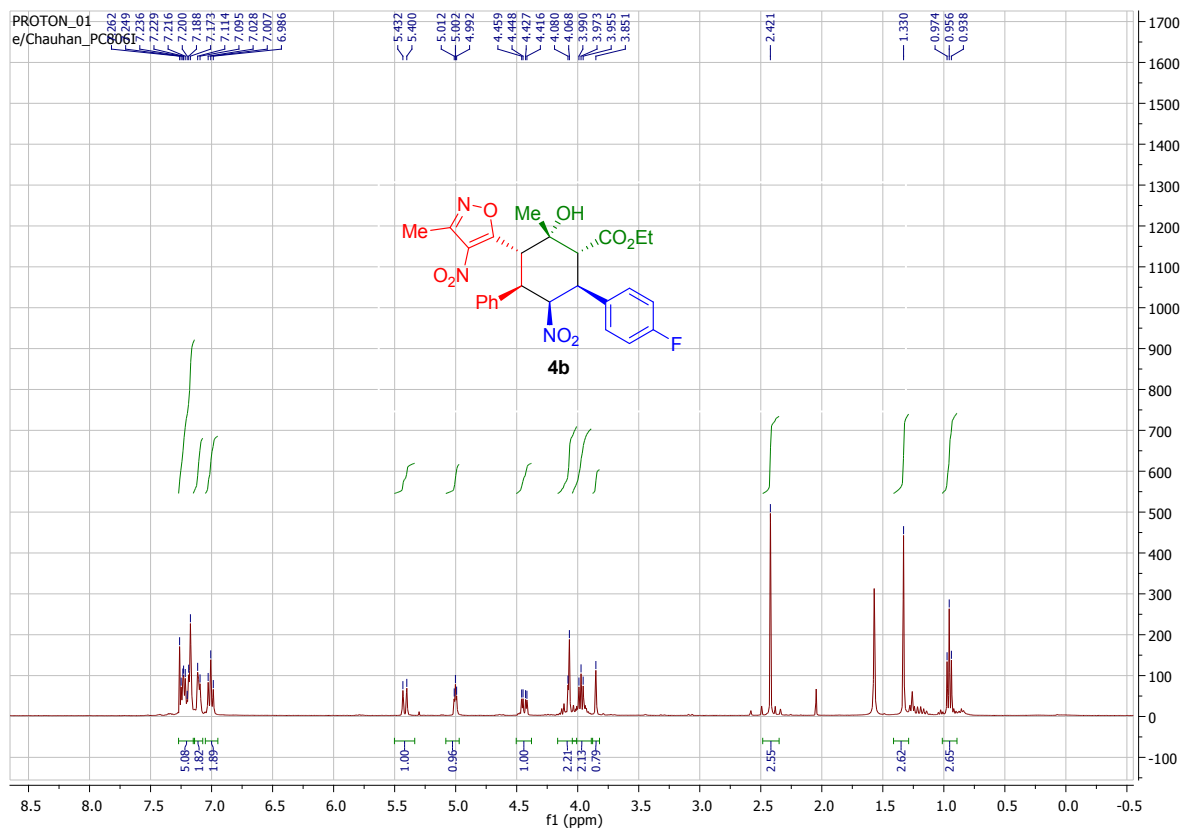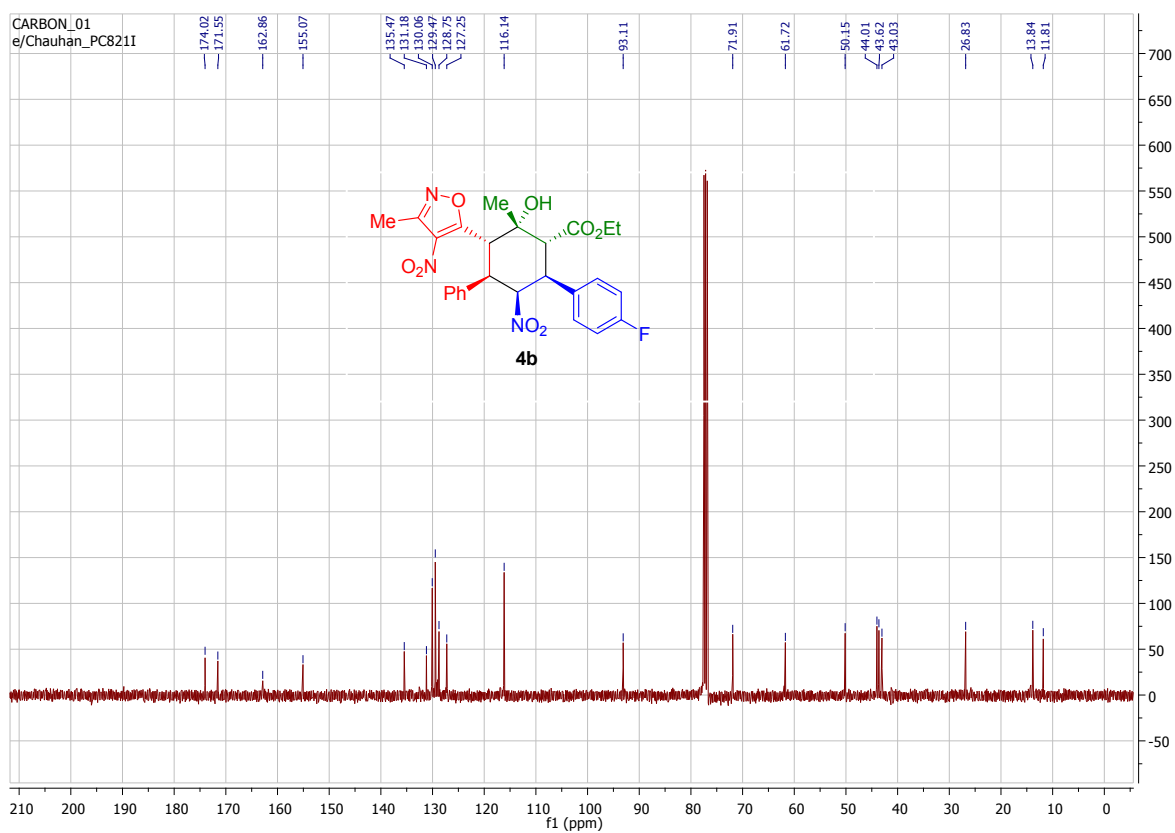



FLUORINE\_01  
e/Chauhan\_PC8061

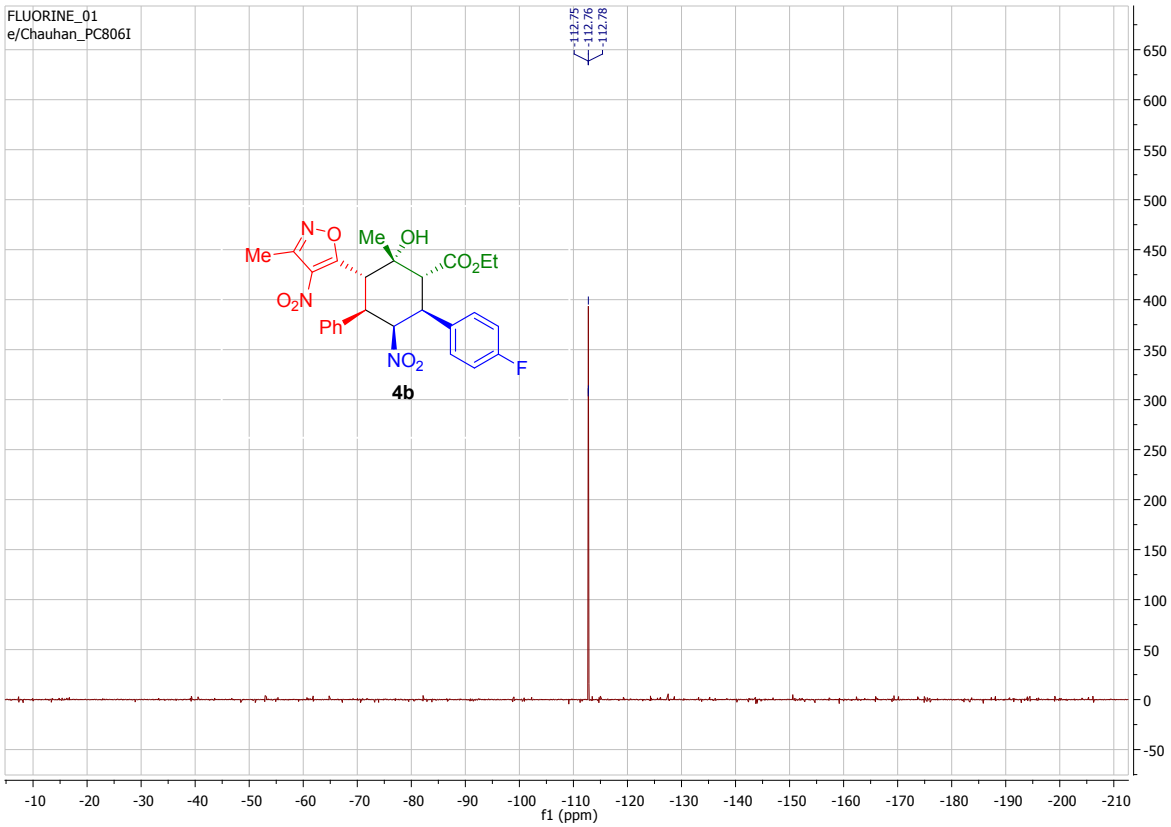

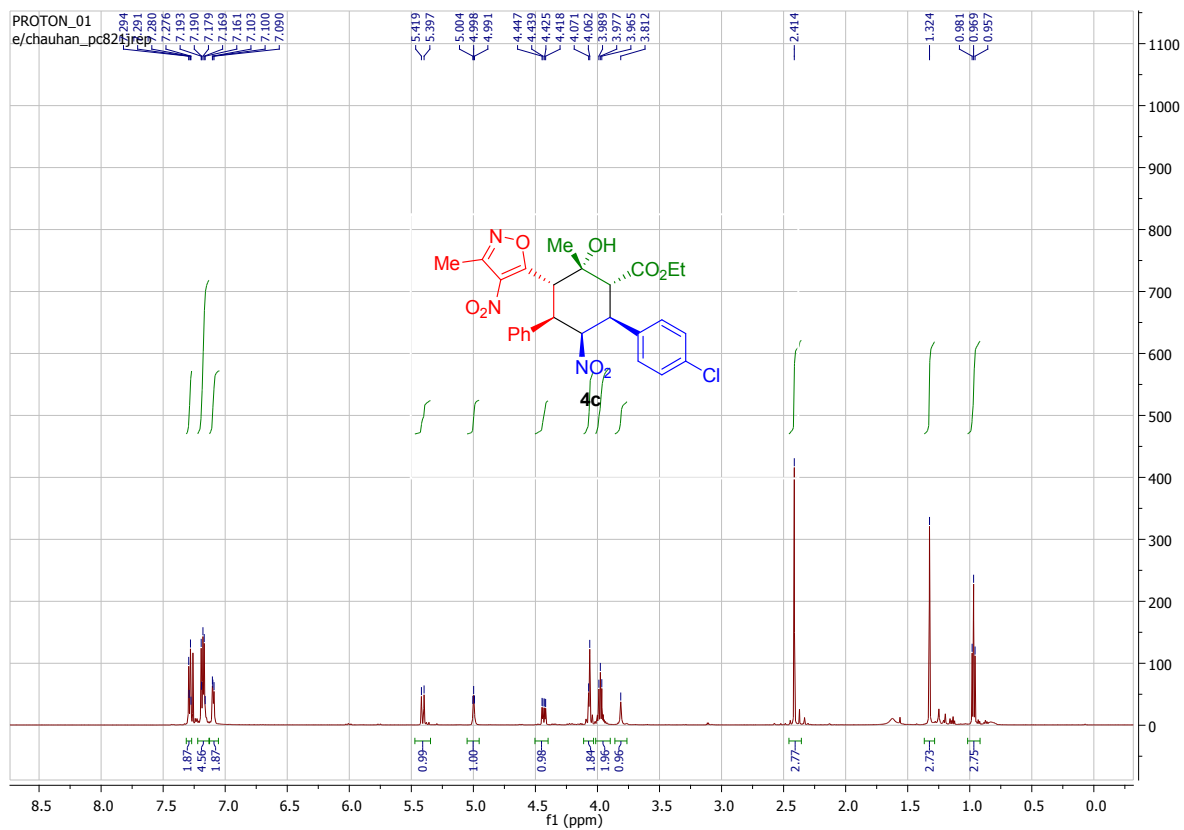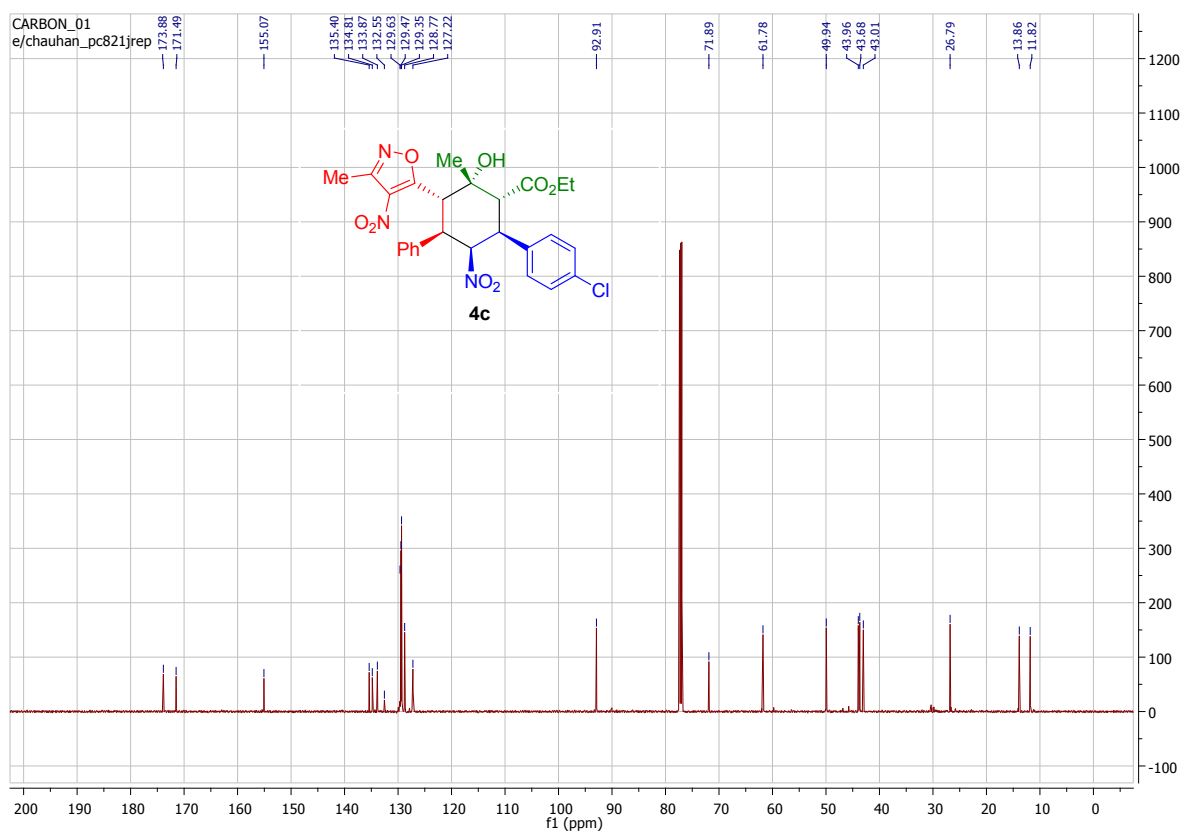

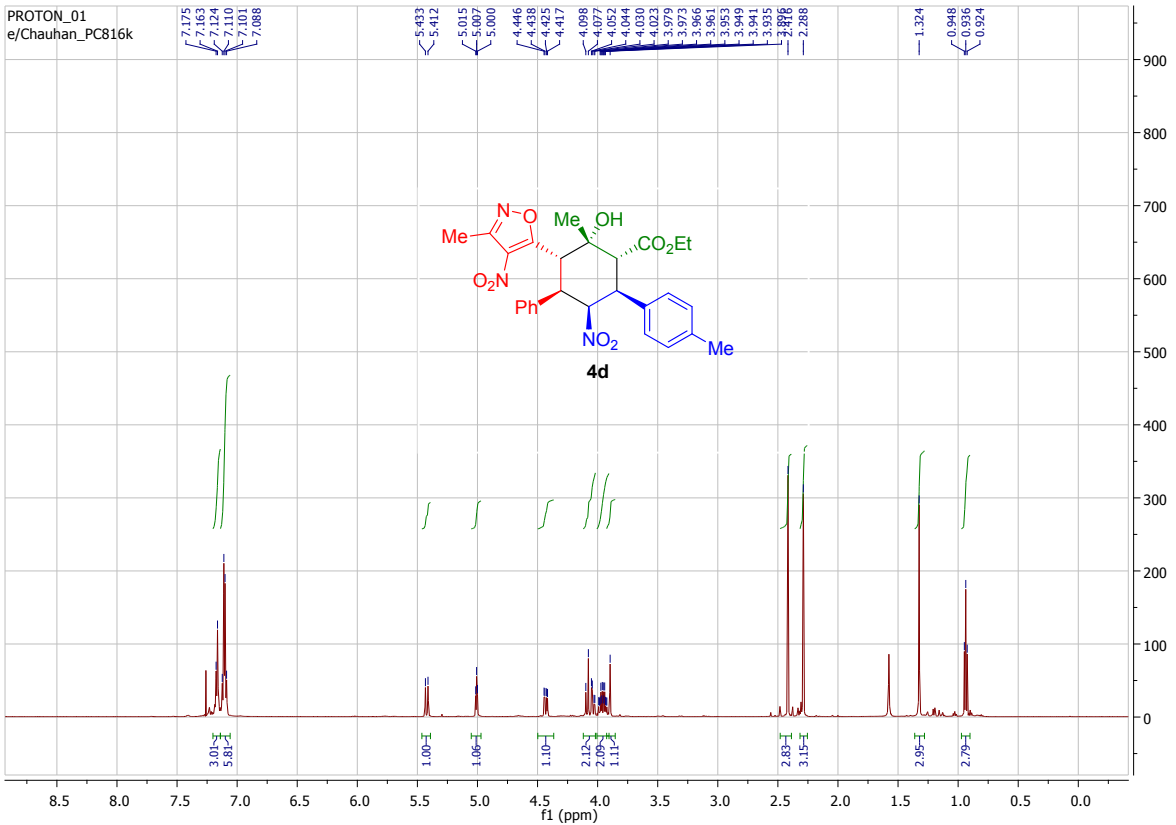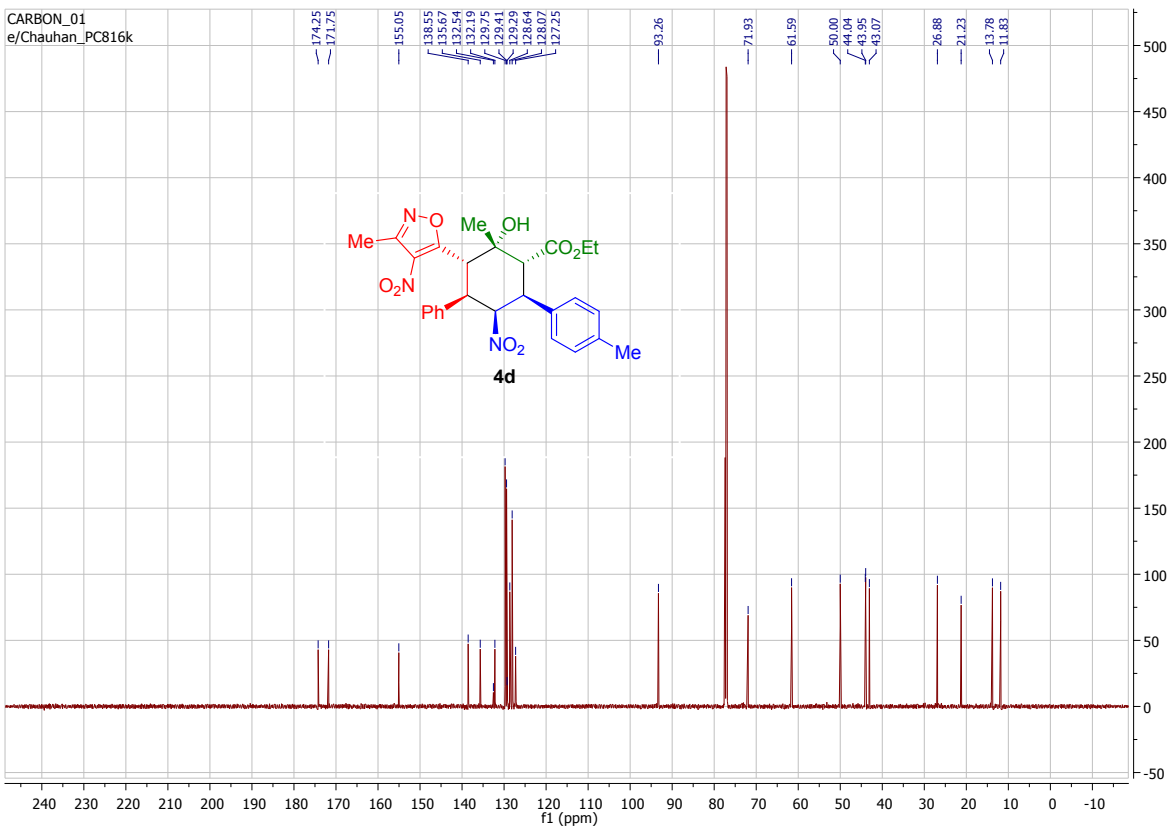

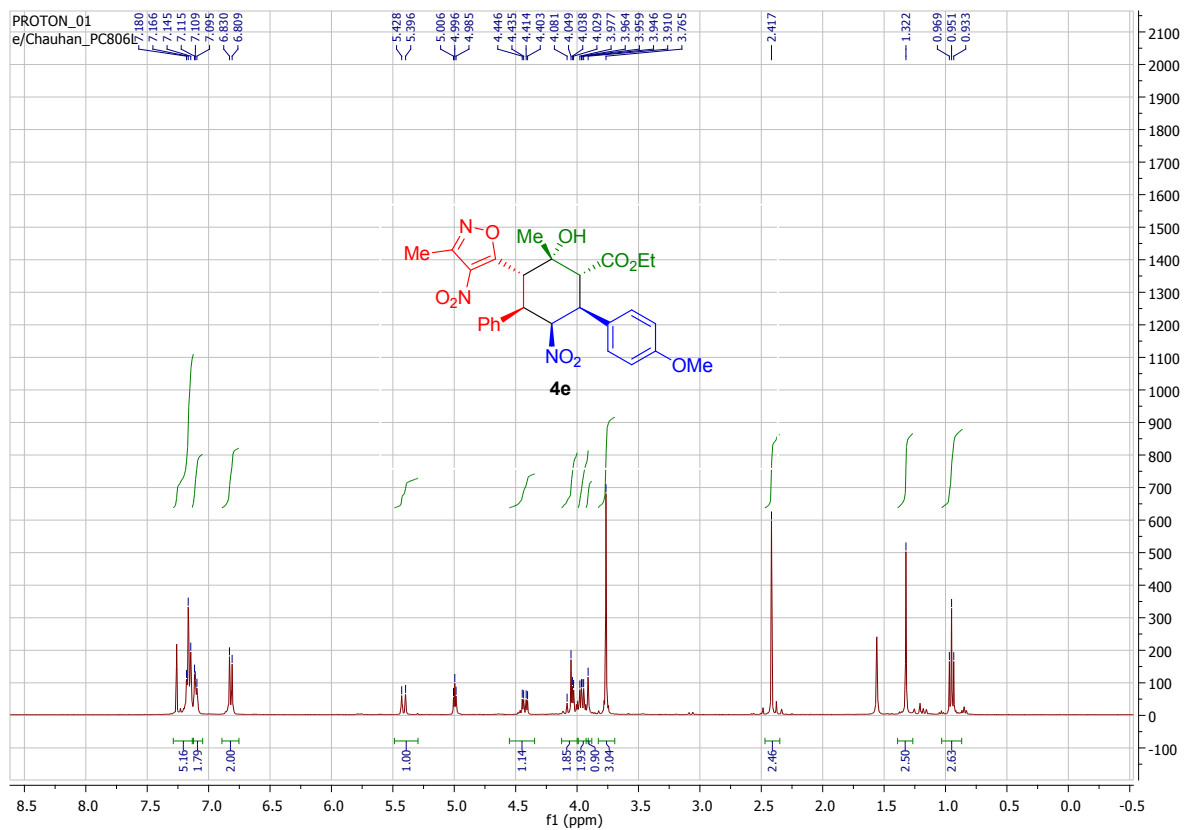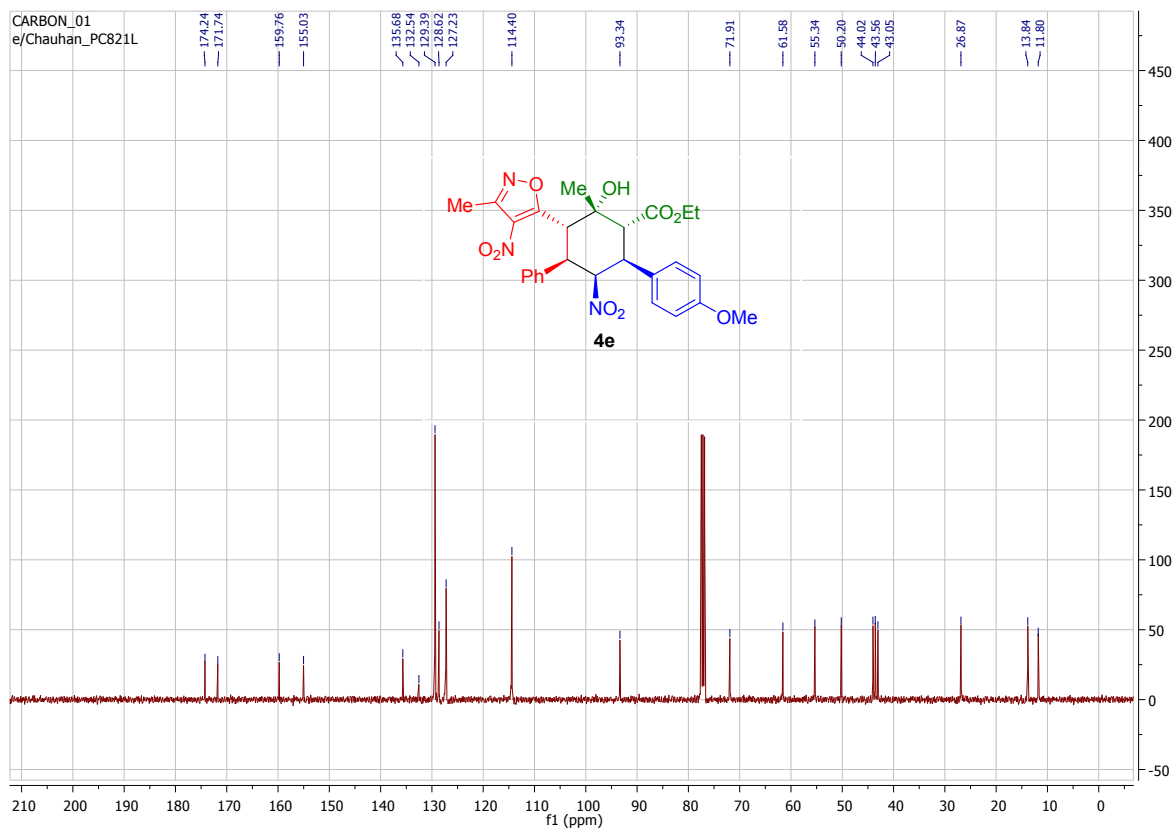

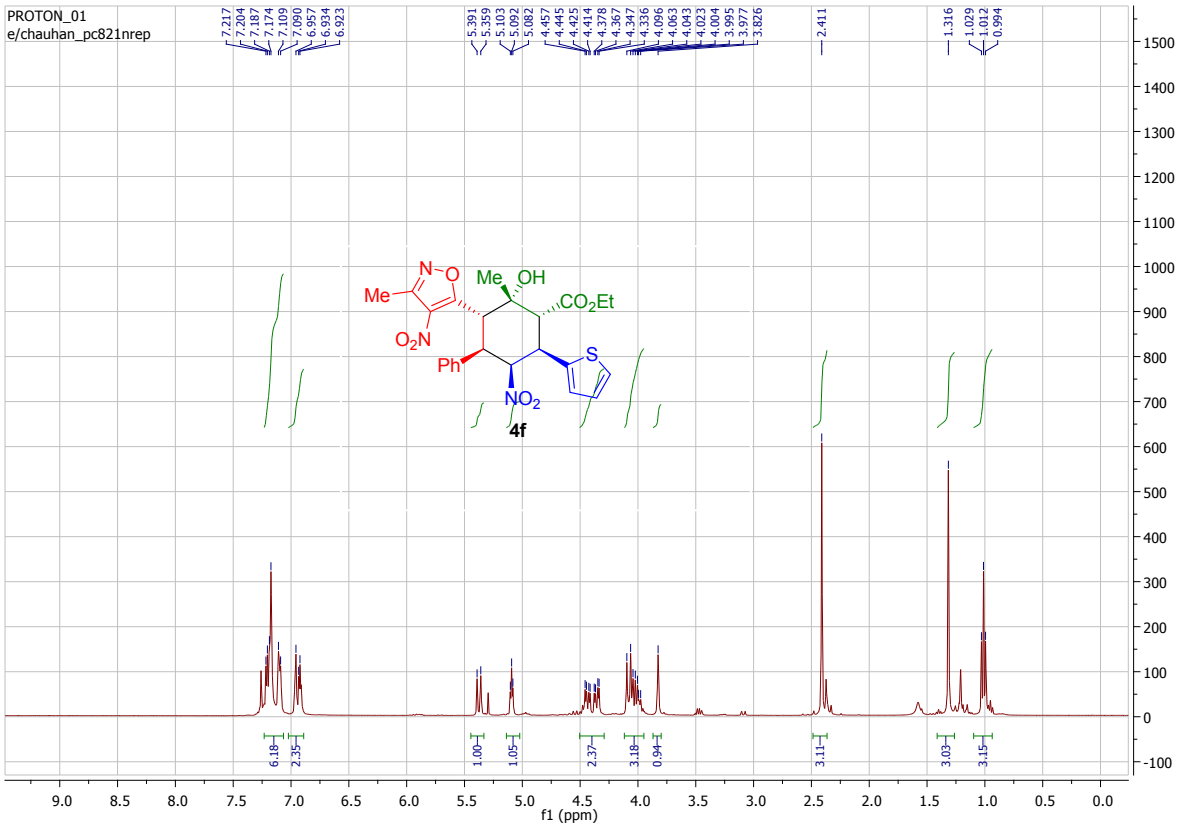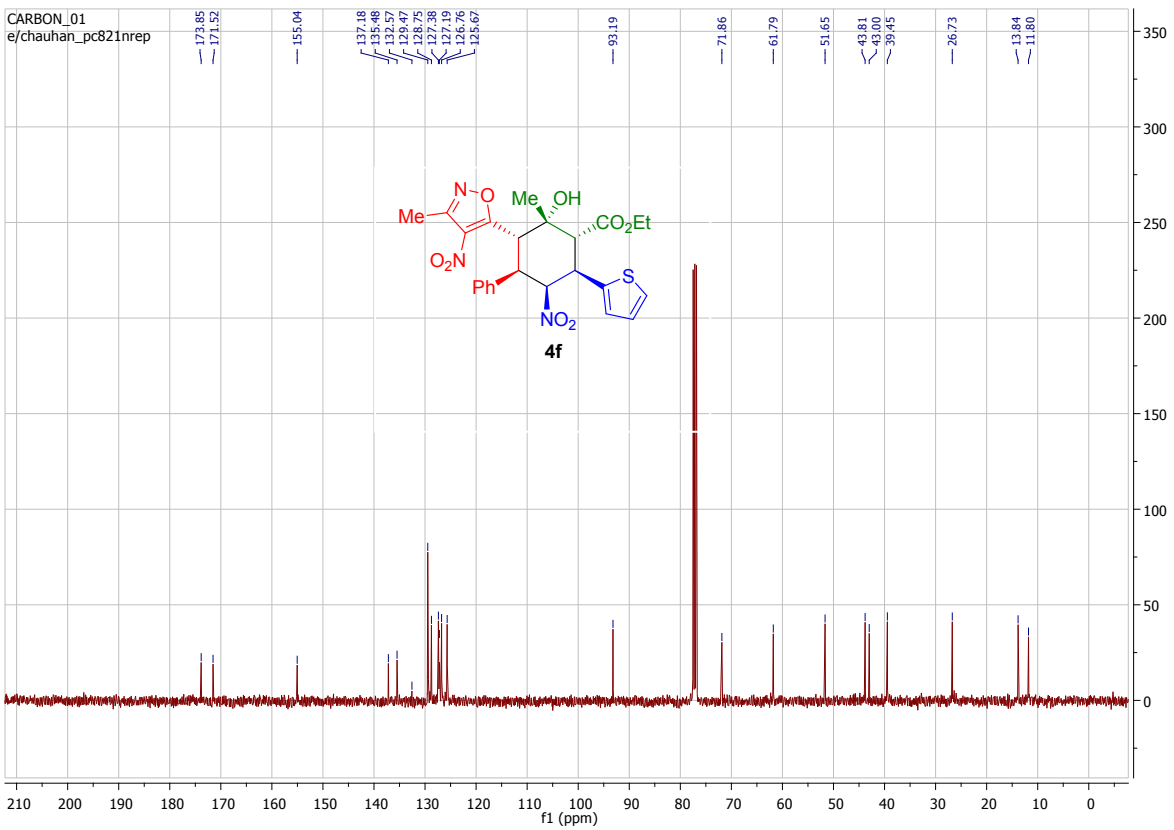

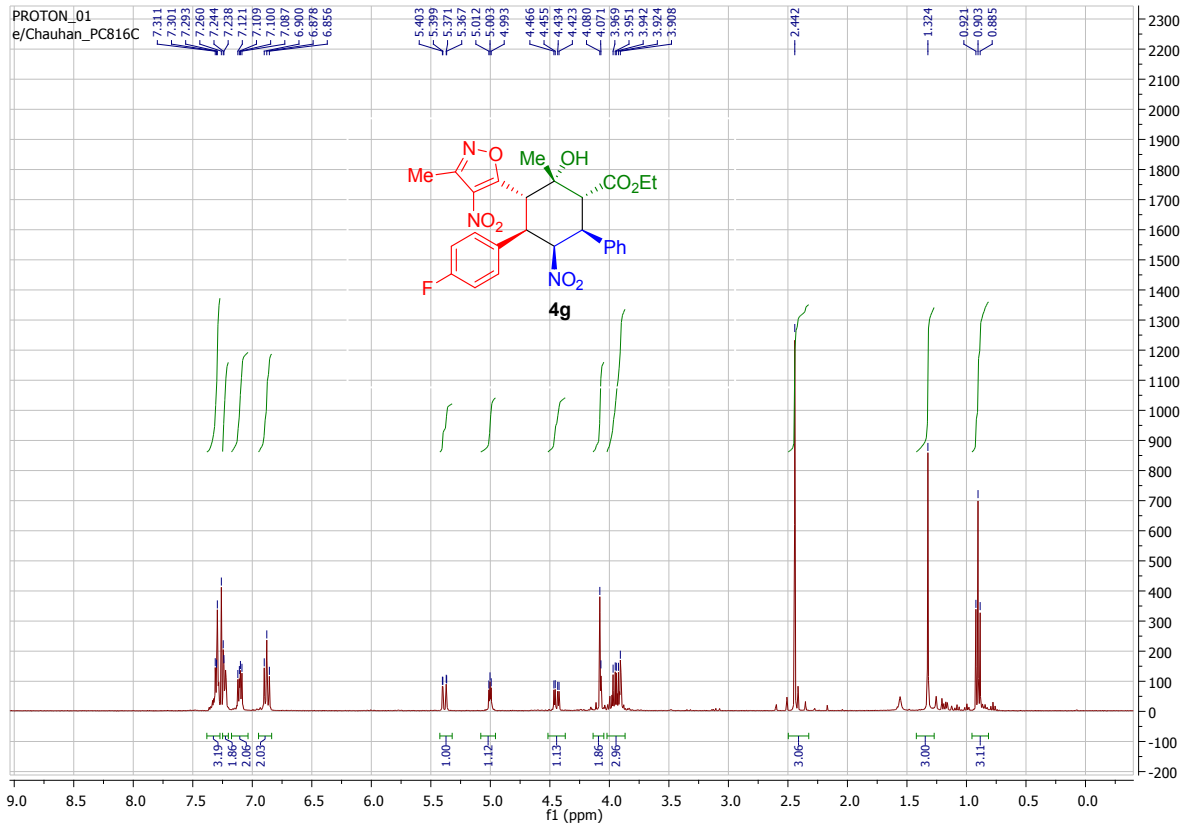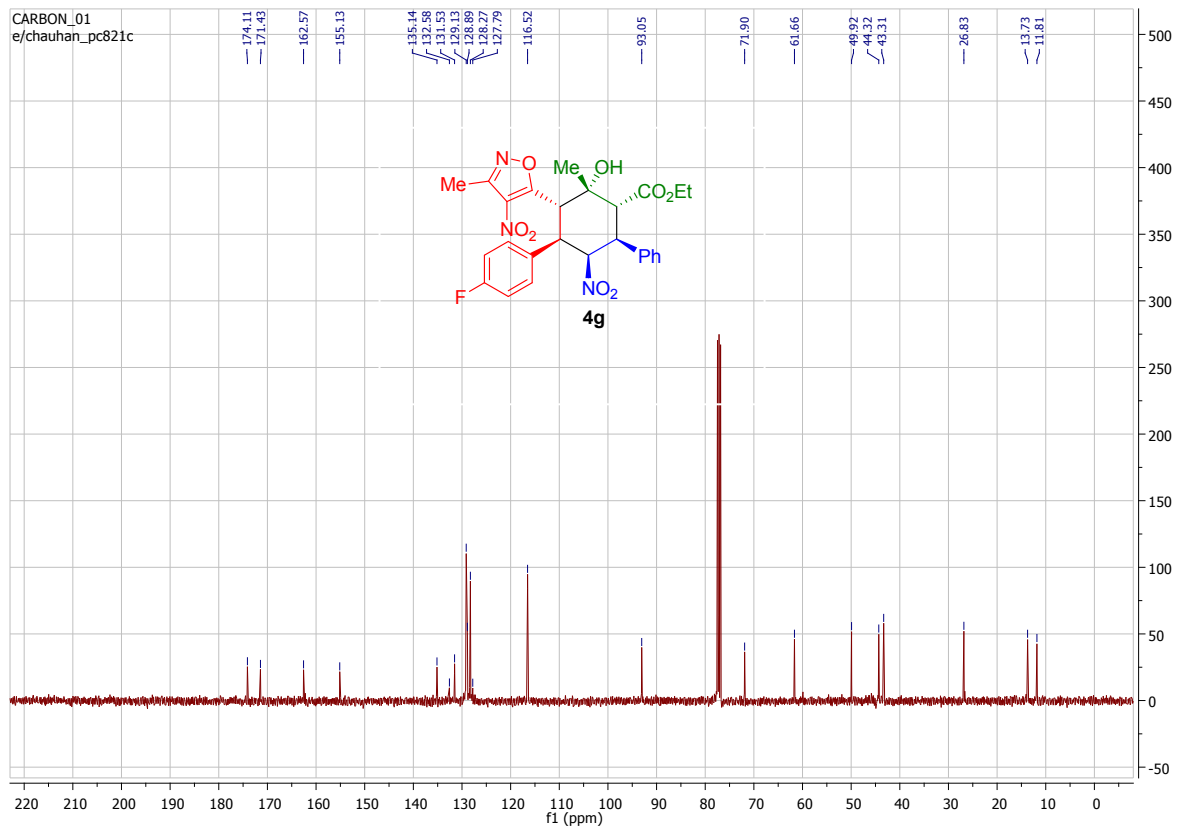

FLUORINE\_01  
e/chauhan\_pc821c

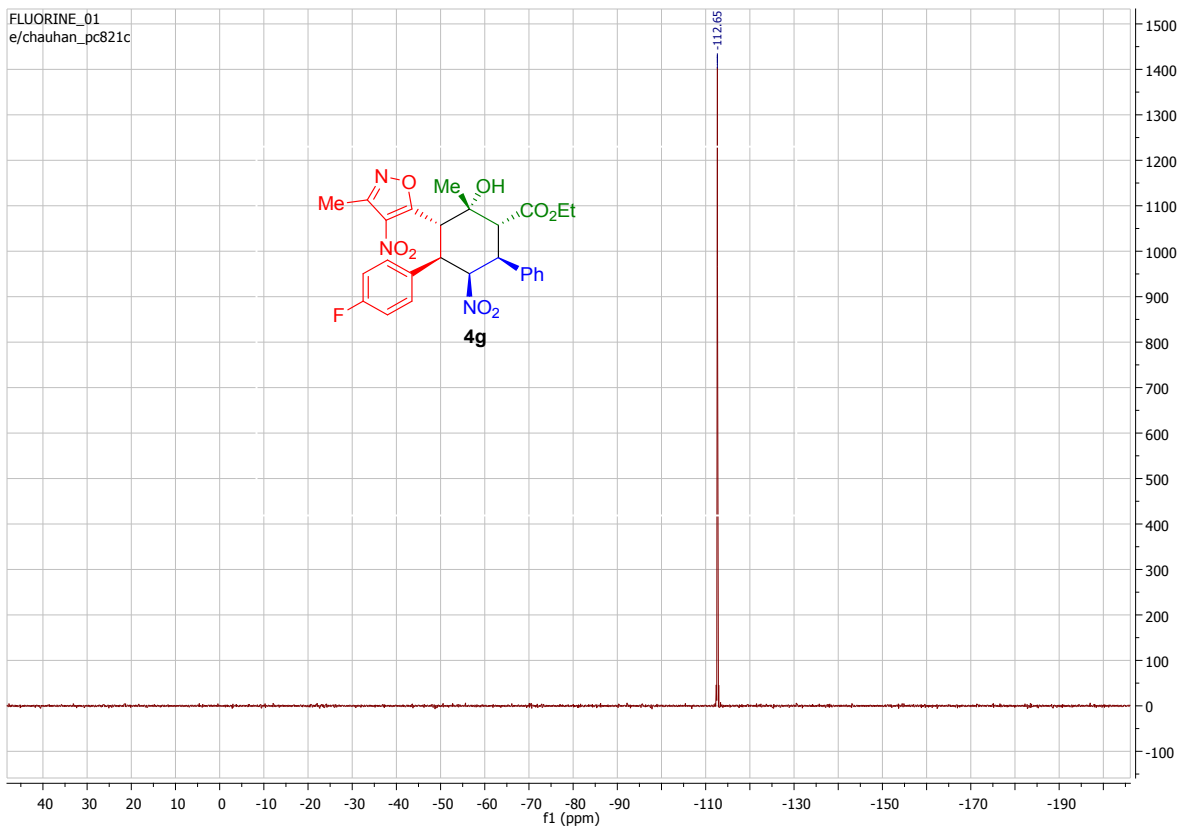

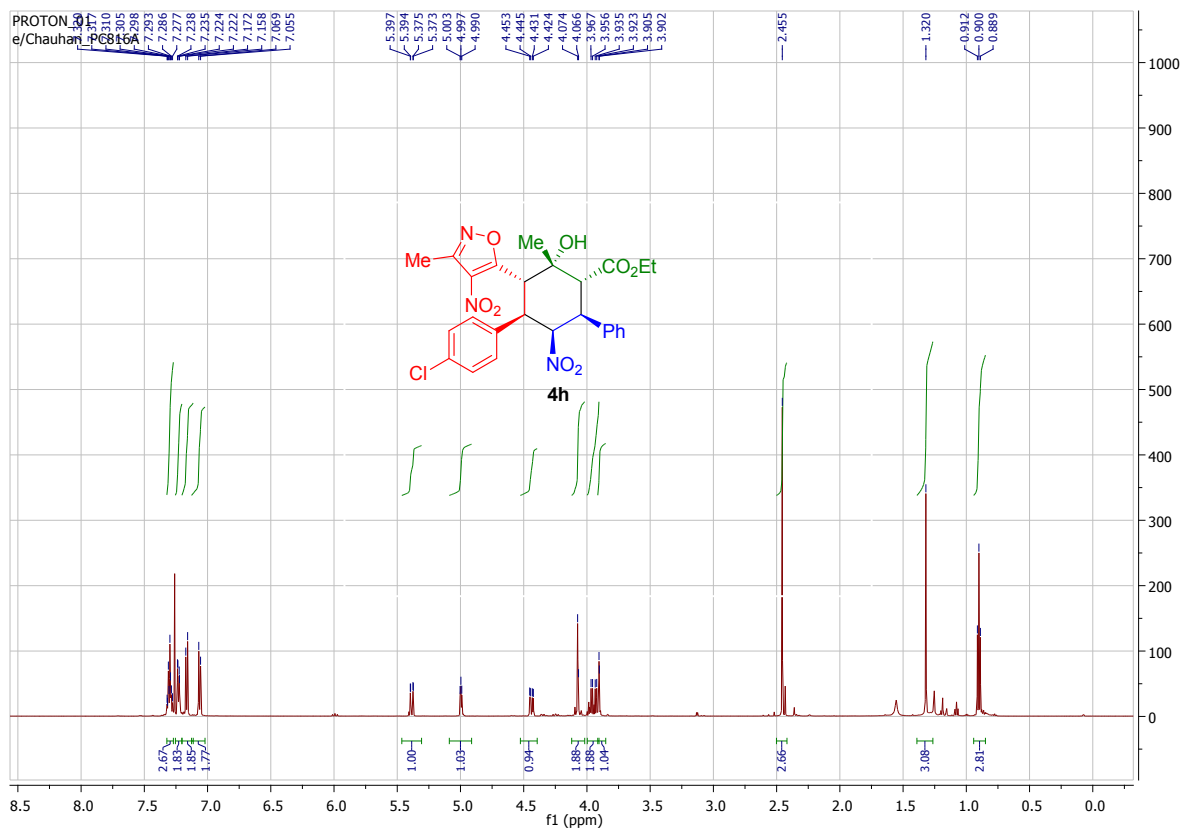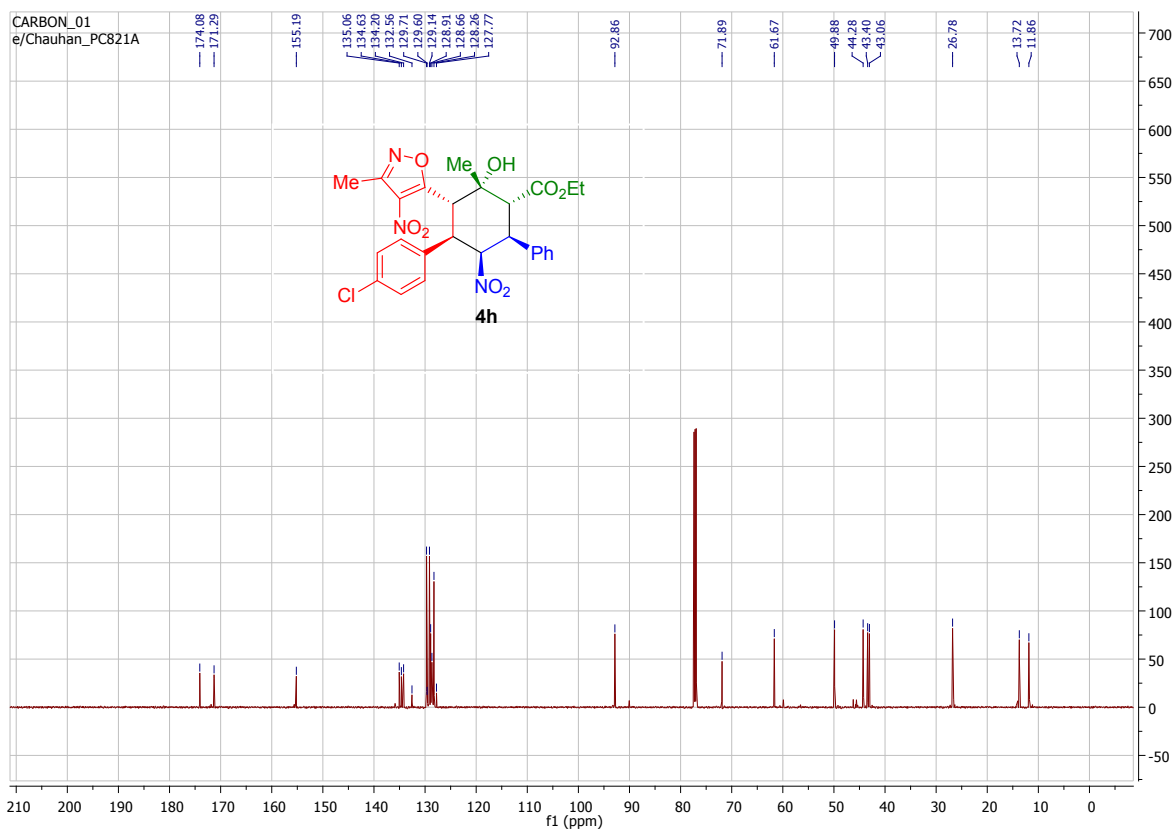



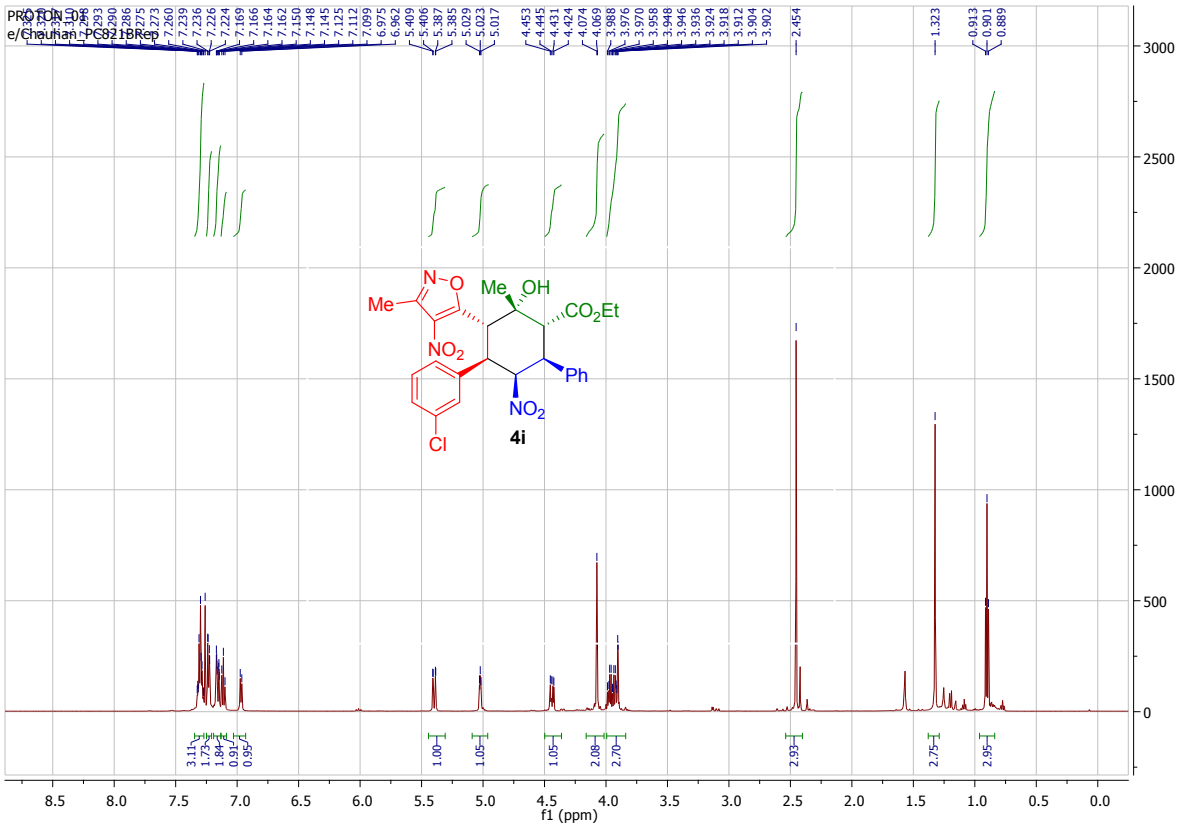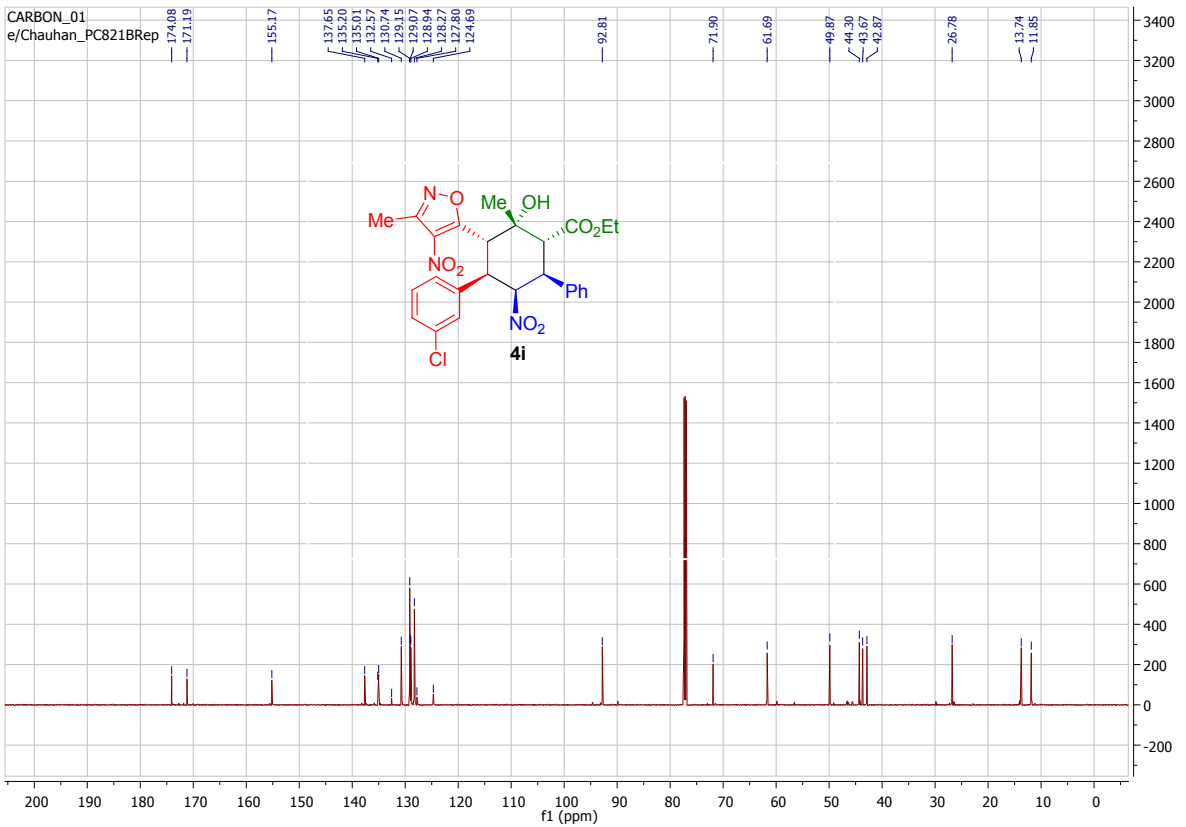

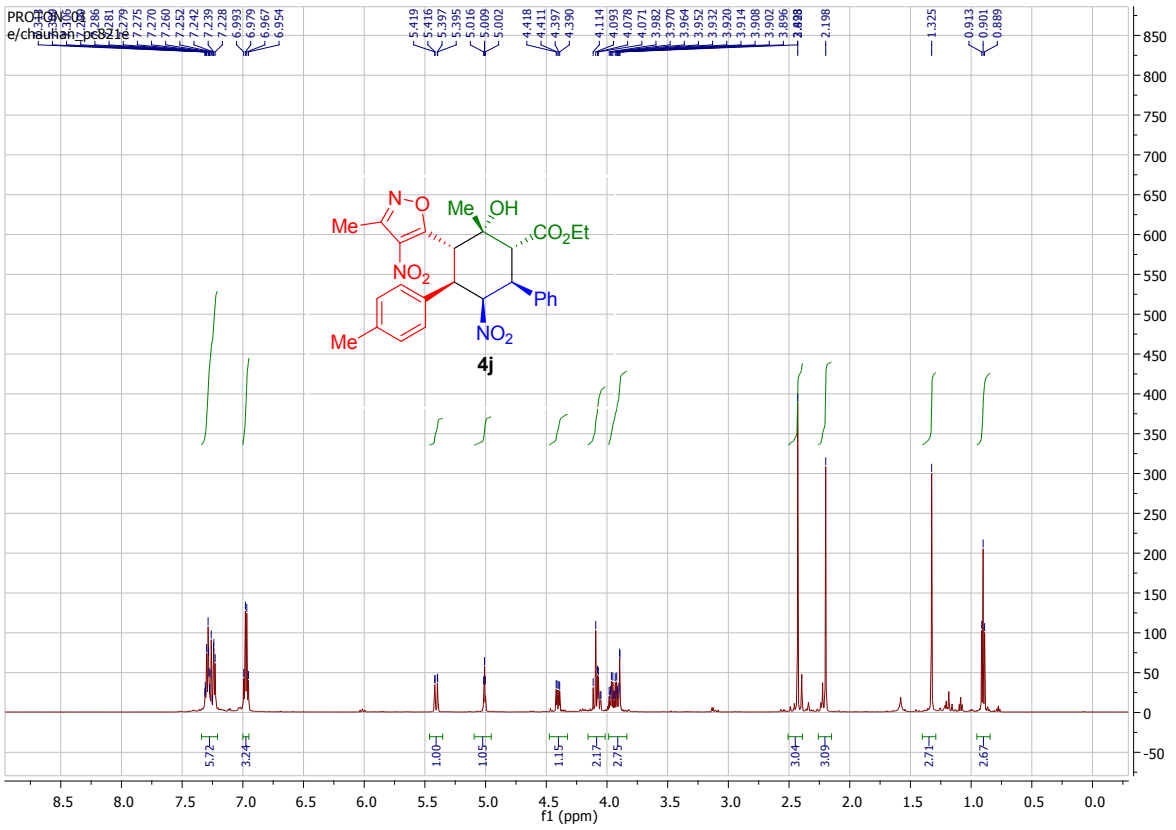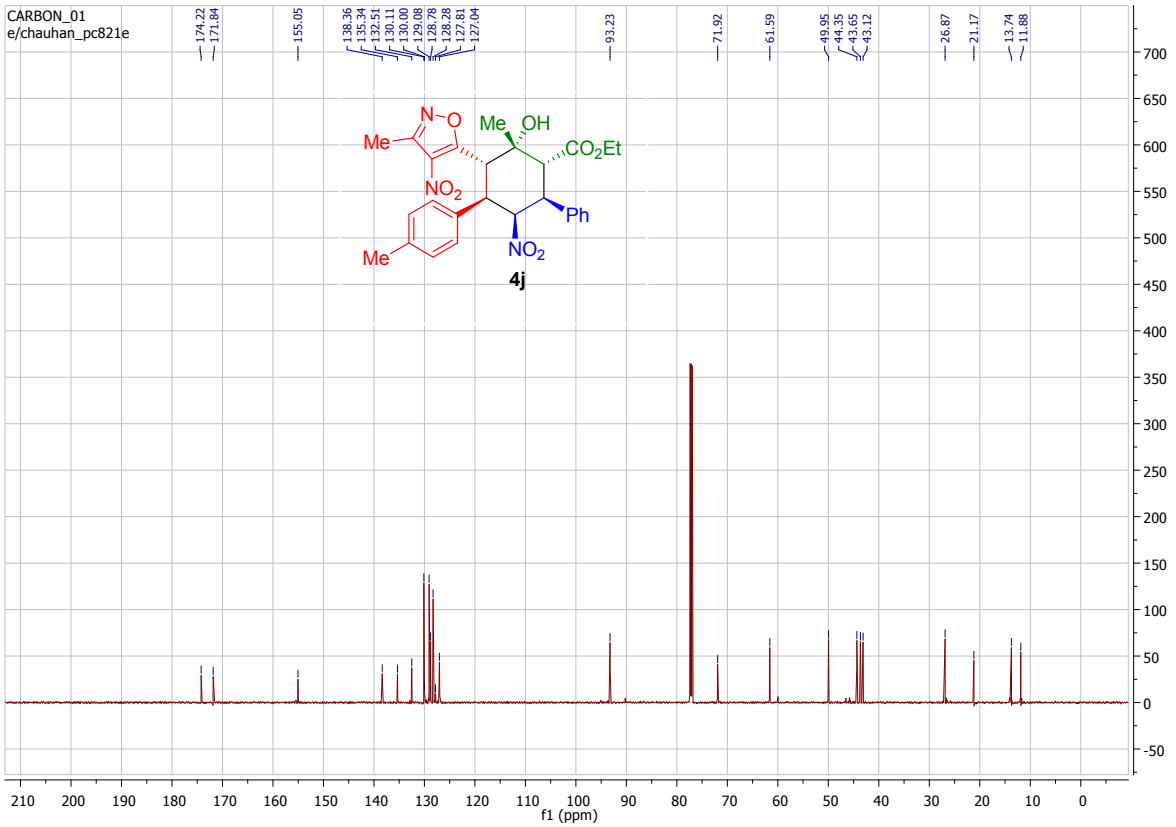

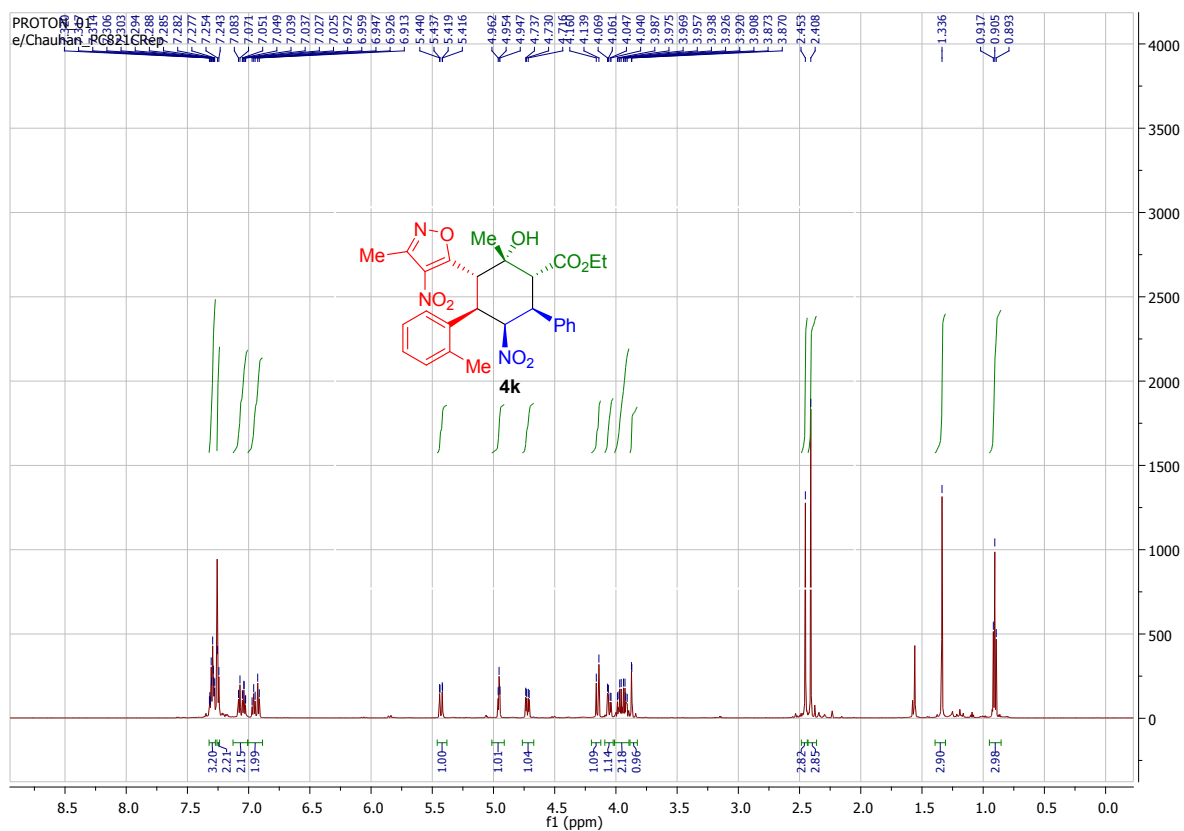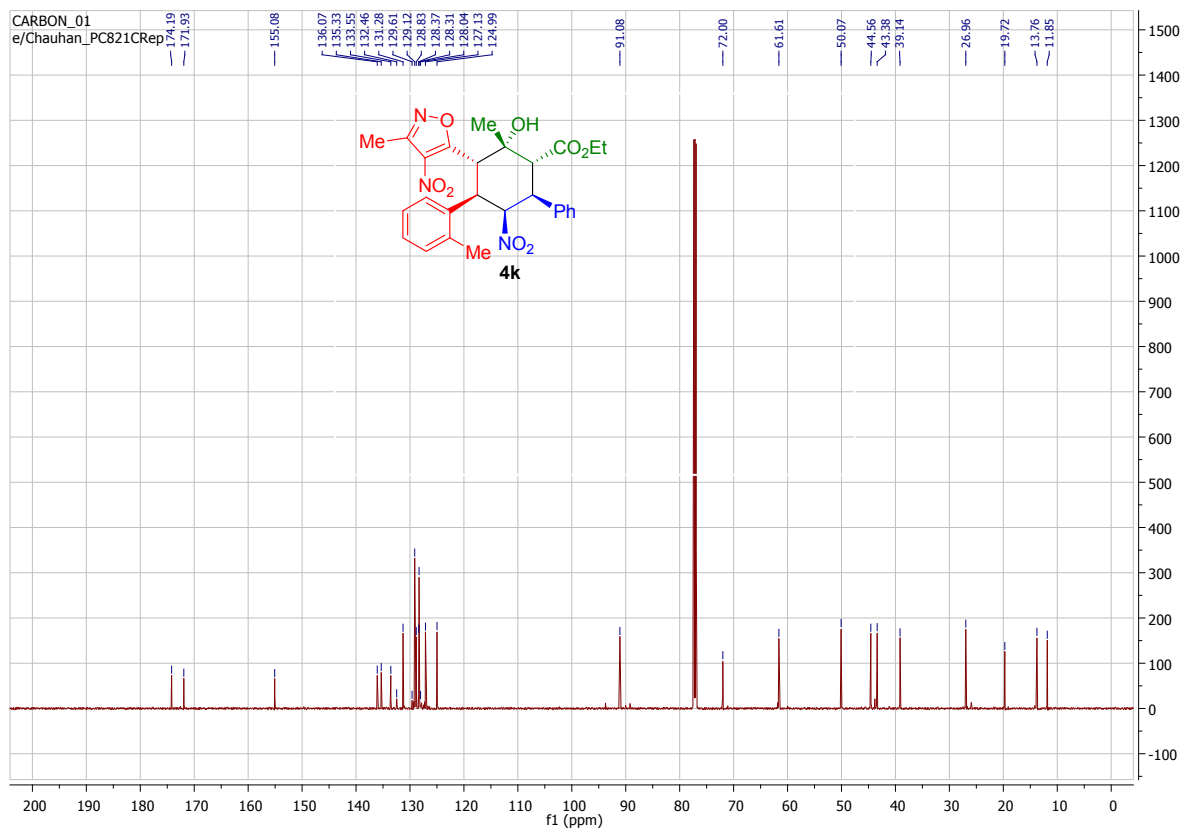

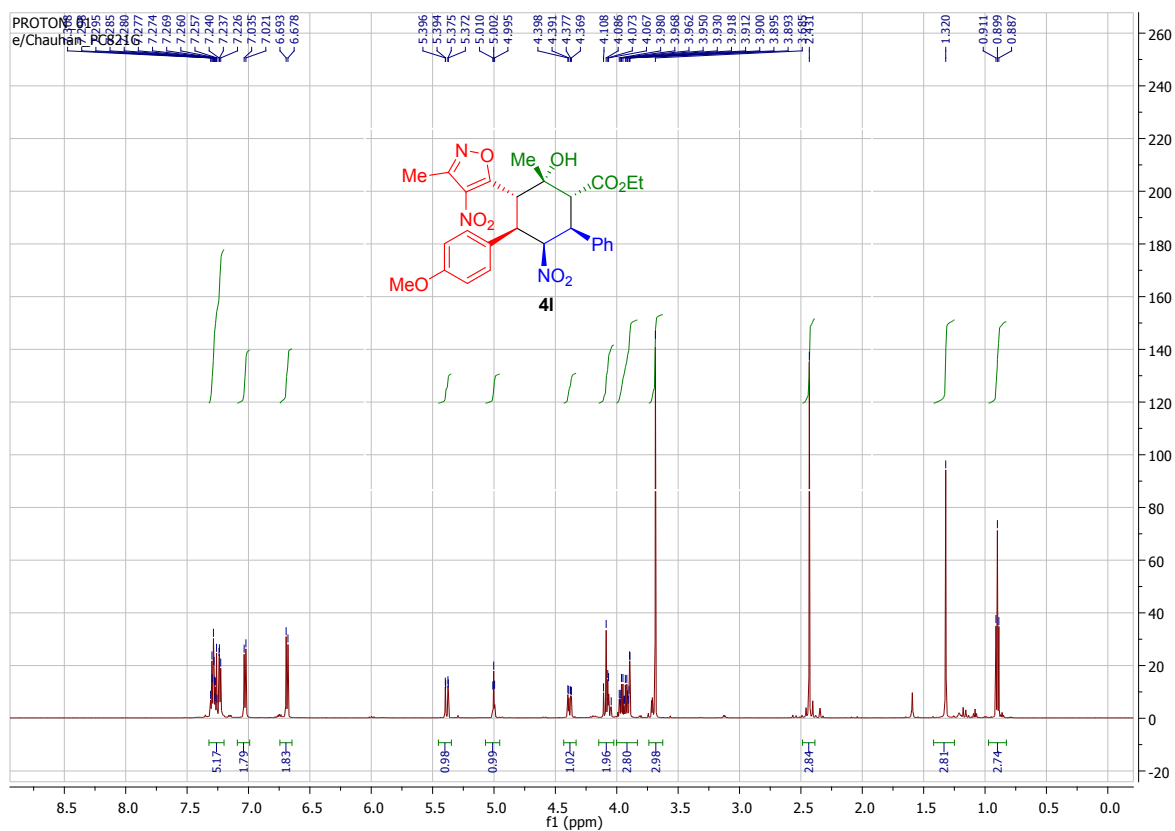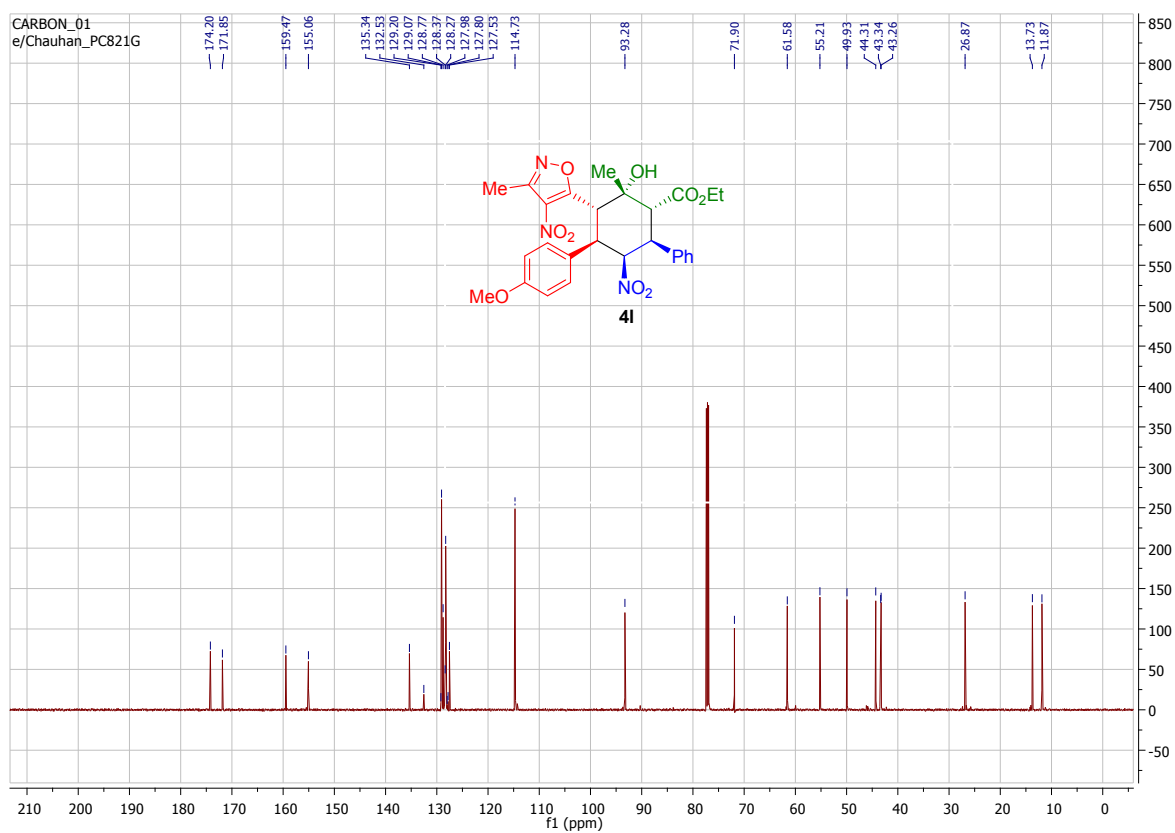

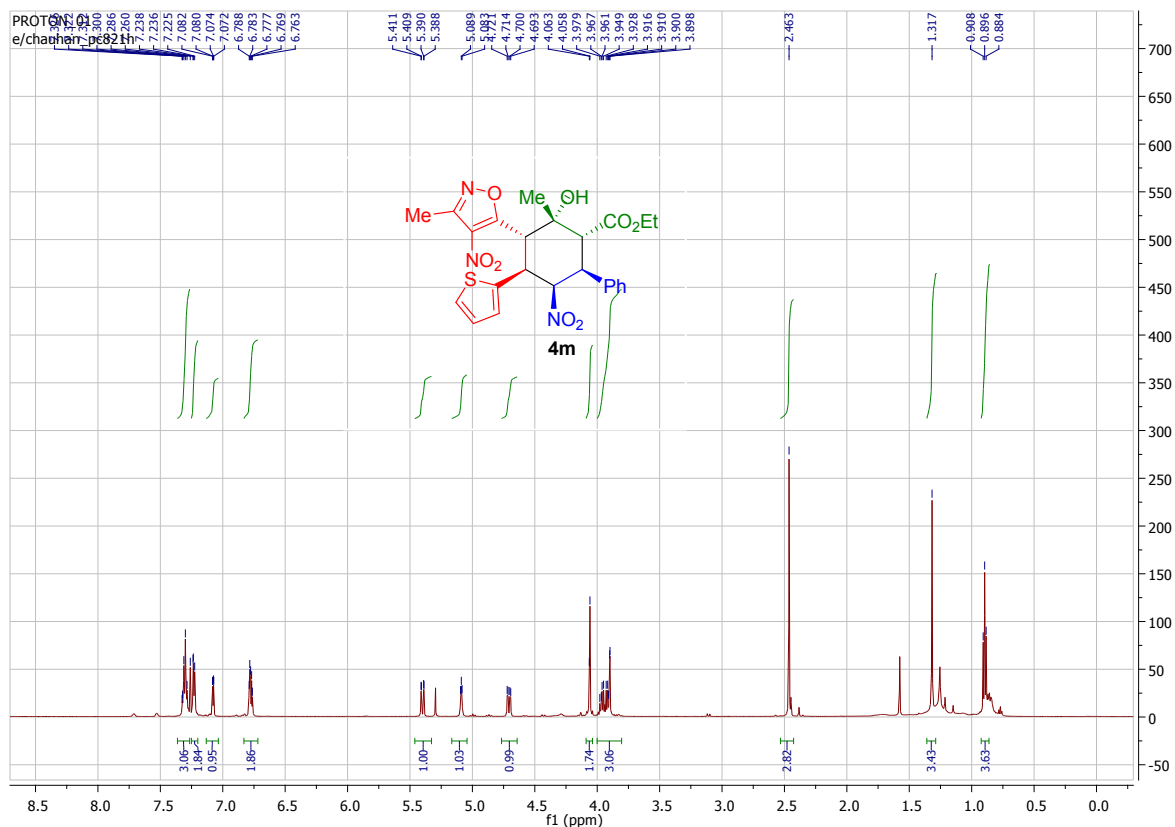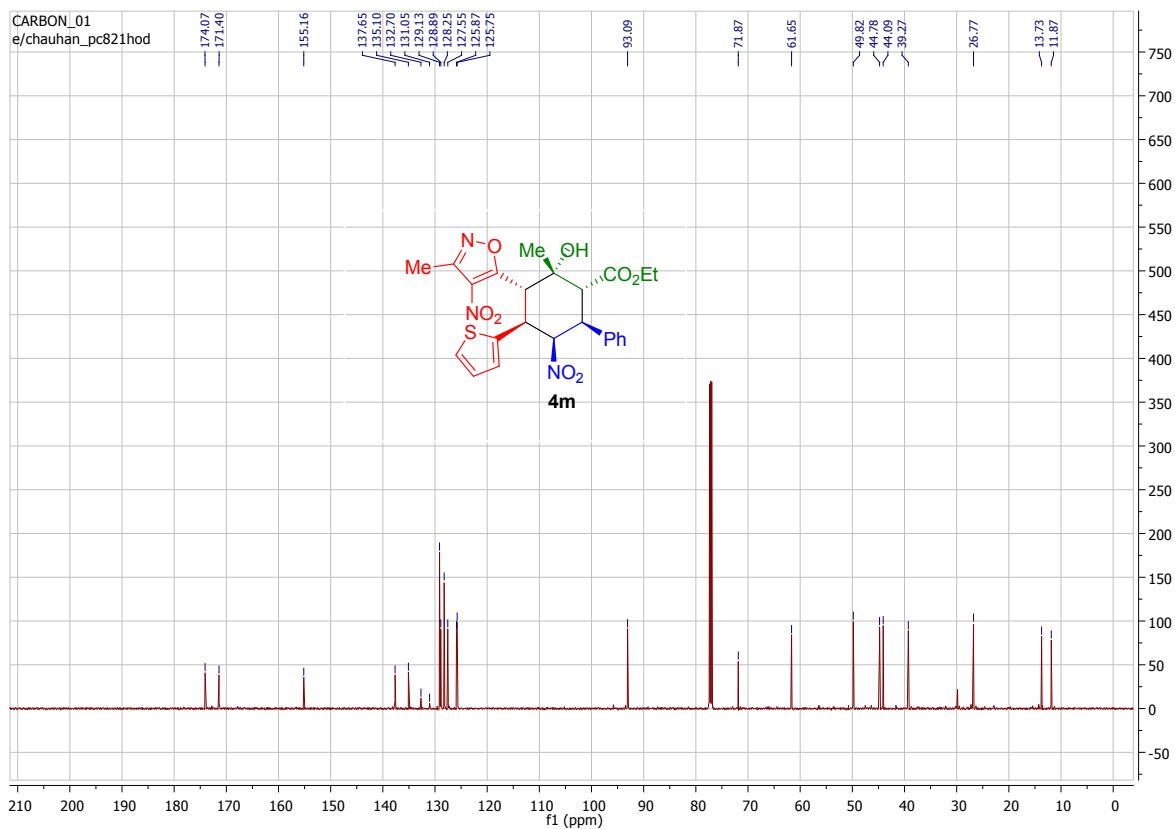

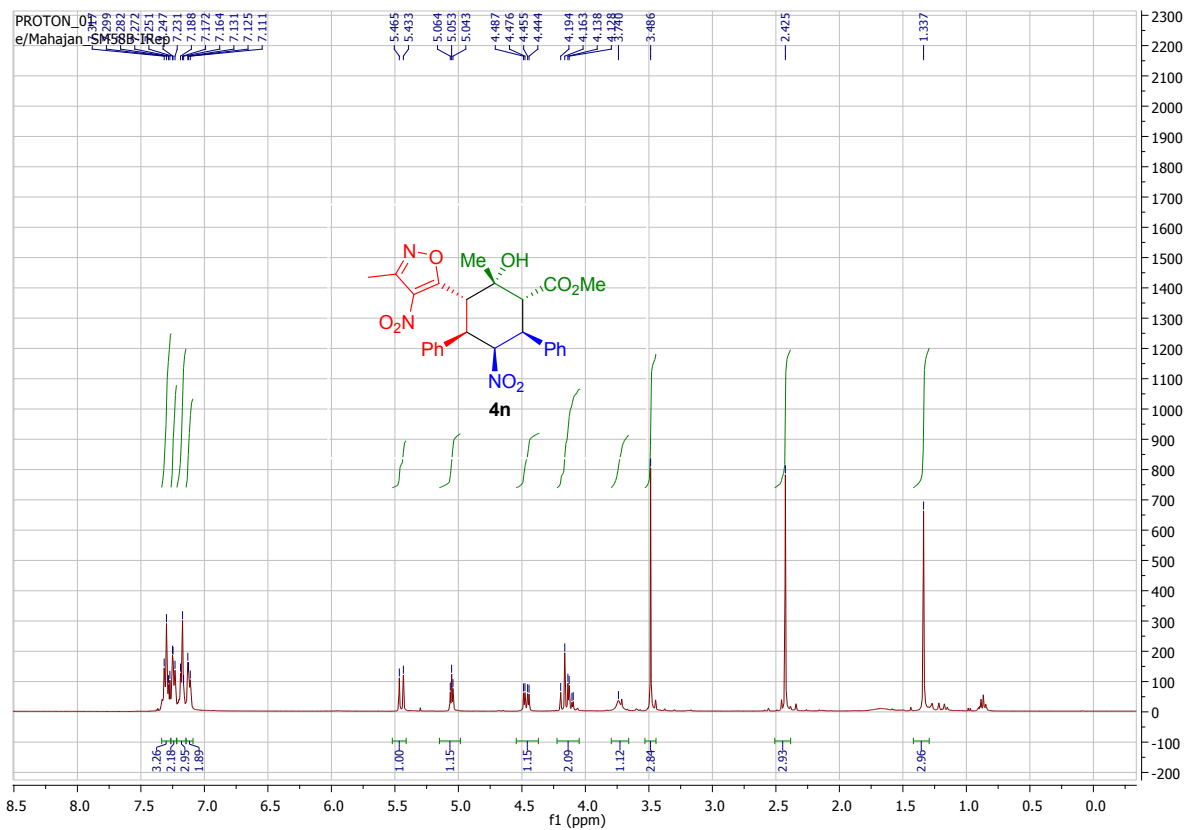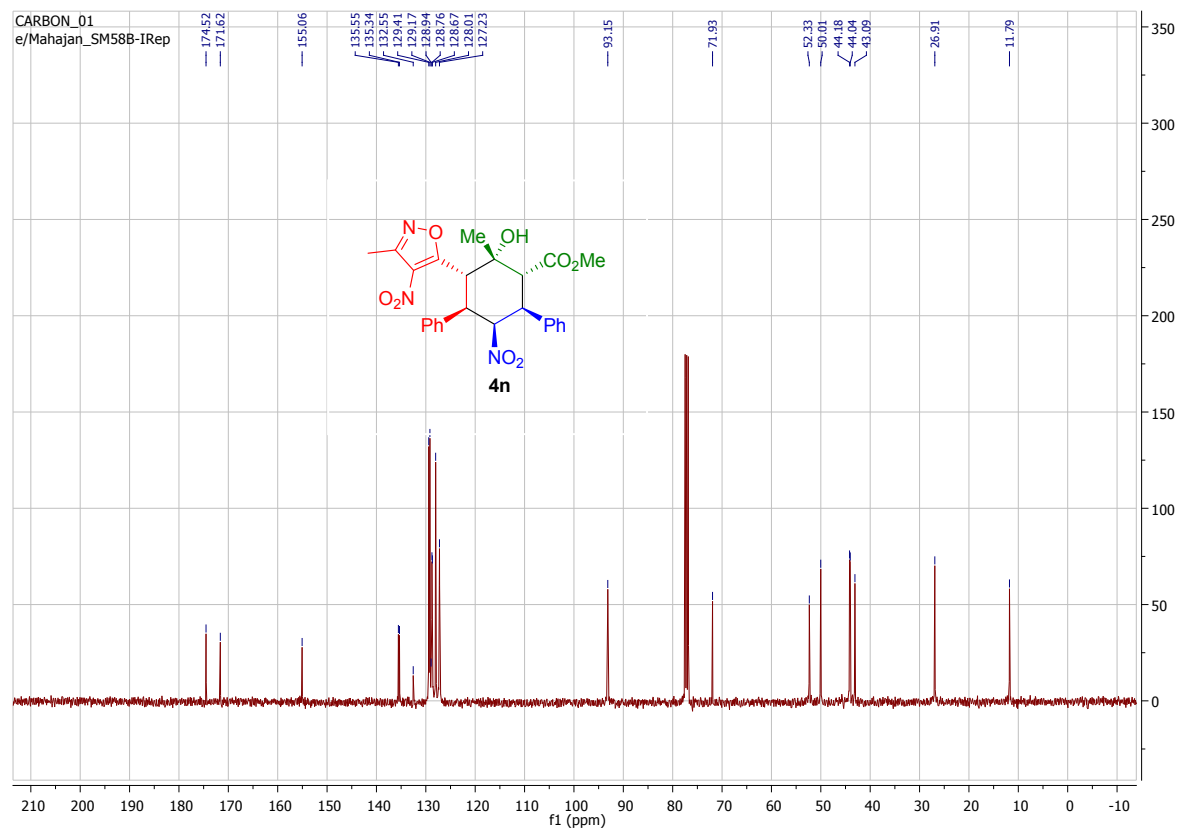

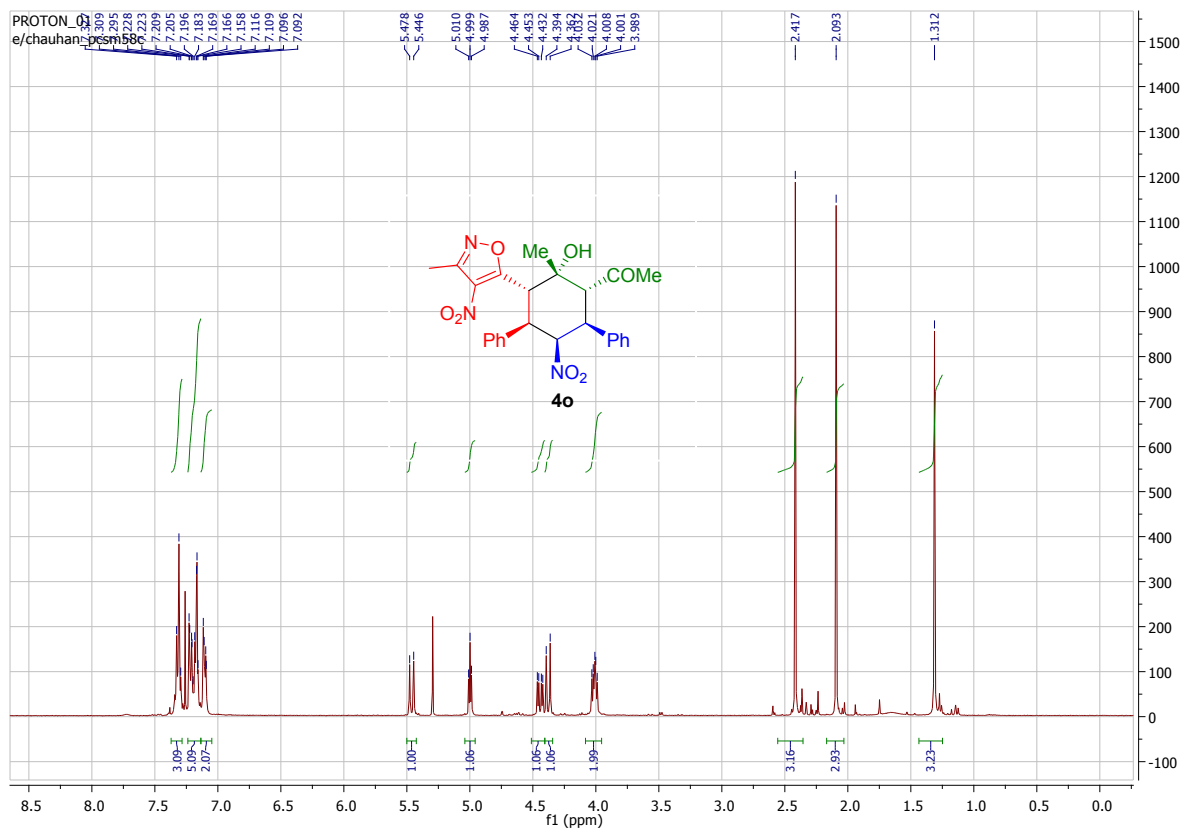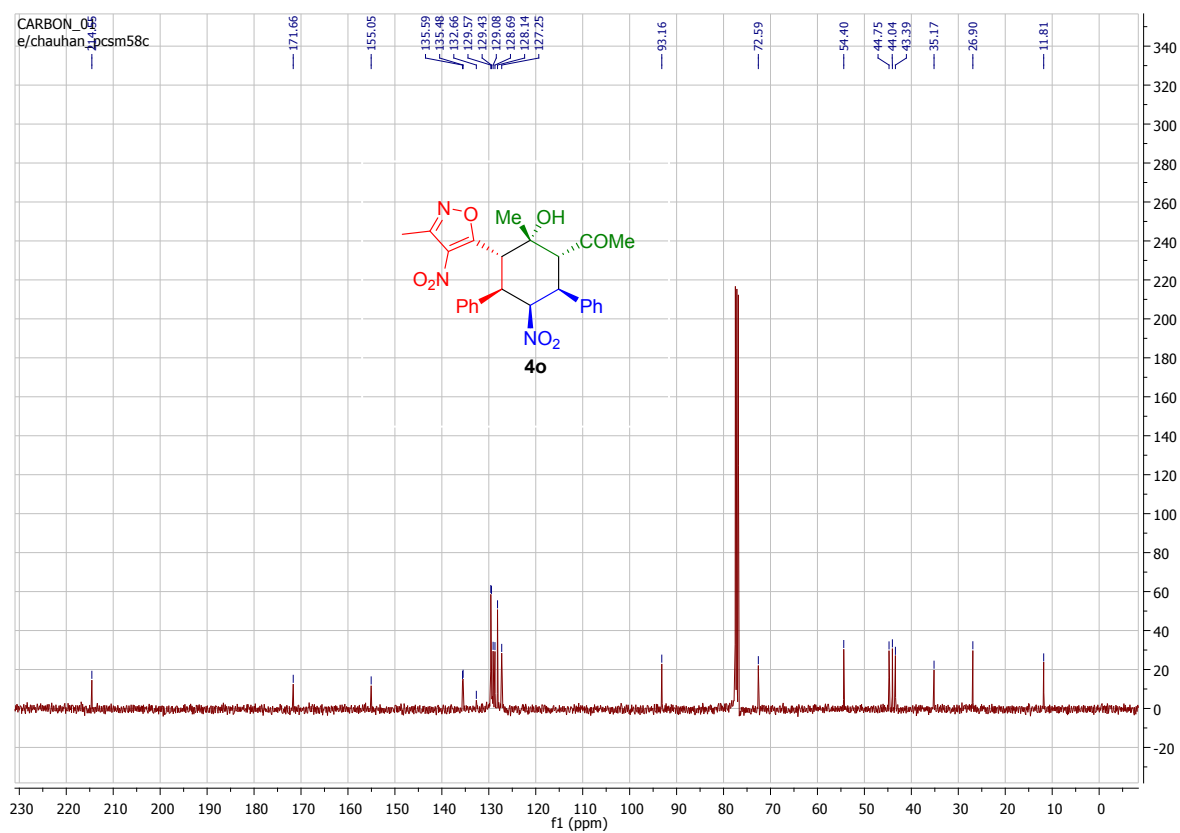

# HPLC Data

Sample Name: SM 38 rac  
 Data file: F:\GONZO\SM38R3AD.D  
 Sample Info: Laufmittel: n-Heptan/iPrOH 7:3;  
 Die Probe ist in EtOH/LM gelöst.

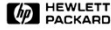

Säule: DAICELAD.M  
 Säuleninfo: Chiralpak AD (250x4,6)mm  
 Operator: Analytik Labor AKEN

Injektion Time: 08:35:36  
 Injektion Date: 13.12.2013

Instrument Conditions: At Start At Stop  
 Temperature in °C: 30.0°C 30.0°C  
 Pressure in bar: 36.1 37.1  
 Flow in ml/min: 1.00 1.00

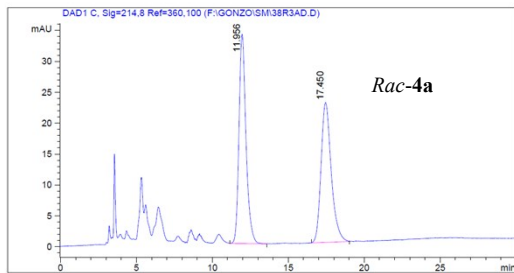

| #     | Ret. Time (min) | Width | Height (mAU) | Area (mAU*s) | Area %  |        |
|-------|-----------------|-------|--------------|--------------|---------|--------|
| 1     | 11.96           | 0.49  | 33.89        | 1088.11      | 50.68   |        |
| 2     | 17.45           | 0.71  | 22.65        | 1058.89      | 49.32   |        |
| Total |                 |       |              |              | 2147.00 | 100.00 |

Sample Name: PC 822 A  
 Data file: D:\GONZO\PC822AAD.D  
 Sample Info: Laufmittel: n-Heptan/iPrOH 7:3;  
 Die Probe ist in LM/DCM gelöst.

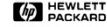

Säule: DAICELAD.M  
 Säuleninfo: Chiralpak AD (250x4,6)mm  
 Operator: Analytik Labor AKEN

Injektion Time: 12:21:04  
 Injektion Date: 20.11.2014

Instrument Conditions: At Start At Stop  
 Temperature in °C: 30.0°C 30.0°C  
 Pressure in bar: 34.5 34.9  
 Flow in ml/min: 1.00 1.00

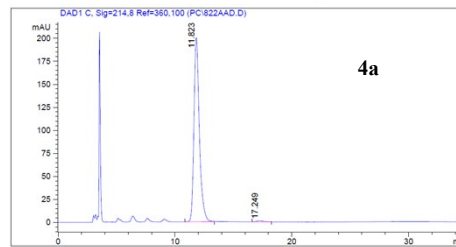

| #     | Ret. Time (min) | Width | Height (mAU) | Area (mAU*s) | Area %  |        |
|-------|-----------------|-------|--------------|--------------|---------|--------|
| 1     | 11.82           | 0.48  | 199.82       | 6413.34      | 99.28   |        |
| 2     | 17.25           | 0.52  | 1.08         | 46.32        | 0.72    |        |
| Total |                 |       |              |              | 6459.67 | 100.00 |

Sample Name: PC 806 J (qd)  
 Data file: D:\GONZO\PC806JQDAD.D  
 Sample Info: Laufmittel: n-Heptan/iPrOH 7:3;  
 Die Probe ist in DCM/LM gelöst.

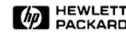

Säule: DAICELAD.M  
 Säuleninfo: Chiralpak AD (250x4,6)mm  
 Operator: Analytik Labor AKEN

Injektion Time: 13:51:58  
 Injektion Date: 24.11.2014

Instrument Conditions: At Start At Stop  
 Temperature in °C: 30.0°C 30.0°C  
 Pressure in bar: 34.4 34.5  
 Flow in ml/min: 1.00 1.00

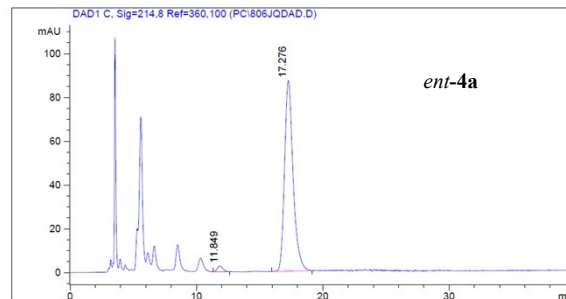

| #     | Ret. Time (min) | Width | Height (mAU) | Area (mAU*s) | Area %  |        |
|-------|-----------------|-------|--------------|--------------|---------|--------|
| 1     | 11.85           | 0.45  | 2.67         | 80.56        | 1.92    |        |
| 2     | 17.28           | 0.71  | 87.04        | 4105.44      | 98.08   |        |
| Total |                 |       |              |              | 4186.00 | 100.00 |



**Sample name:** PC 816 +821 I  
**Data file:** C:\SNOOPY\PC\813682\IIC.D  
**Description:** Laufmittel: n-Heptan/iPrOH 9:1;  
 Probe ist in LM/DCM gelöst  
**Injection date:** 11/11/2014 8:34:53 AM  
**Acq. Analysis method:** CHIRALPAKIC1-6LNP.M

**Column:** Chiralpak IC, (150 x 4.6) mm, 5µ, SN: IC00CD-QF015

**Pressure at start:** 25 bar **Start flow:** 0.700 ml/min **Column oven:** 22.67 °C

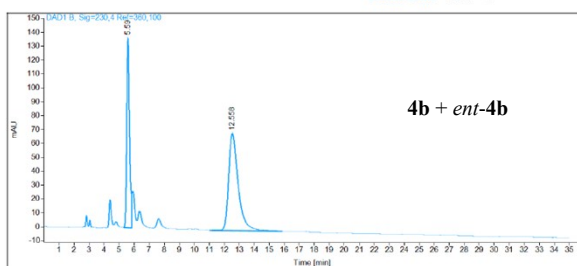

| Name | PC 816 +821 I | RT [min] | Type | Area%  | Area    | Height | Width [min] |
|------|---------------|----------|------|--------|---------|--------|-------------|
|      |               | 5.59     | BV   | 36.77  | 1807.43 | 136.54 | 0.20        |
|      |               | 12.56    | BB   | 63.23  | 3107.61 | 69.80  | 0.67        |
|      |               | Sum      |      | 100.00 | 4915.04 |        |             |

**Sample name:** PC 821 IA  
**Data file:** C:\SNOOPY\PC\821\IAIC.D  
**Description:** Laufmittel: n-Heptan/iPrOH 8:1;  
 Probe ist in LM/DCM gelöst  
**Injection date:** 11/24/2014 11:05:10 AM  
**Acq. Analysis method:** CHIRALPAKIC1-6LNP.M

**Column:** Chiralpak IC, (150 x 4.6) mm, 5µ, SN: IC00CD-QF015

**Pressure at start:** 27 bar **Start flow:** 0.700 ml/min **Column oven:** 23 °C

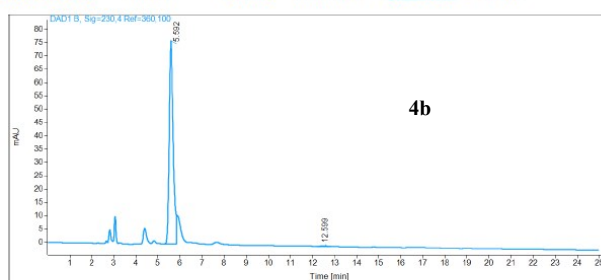

| Name | PC 821 IA | RT [min] | Type | Area%  | Area    | Height | Width [min] |
|------|-----------|----------|------|--------|---------|--------|-------------|
|      |           | 5.59     | MF   | 99.84  | 1000.98 | 78.31  | 0.22        |
|      |           | 12.60    | MM   | 0.36   | 3.63    | 0.15   | 0.40        |
|      |           | Sum      |      | 100.00 | 1004.60 |        |             |

**Sample name:** PC 816 I  
**Data file:** C:\SNOOPY\PC\816\IIC.D  
**Description:** Laufmittel: n-Heptan/iPrOH 9:1;  
 Probe ist in LM/DCM gelöst  
**Injection date:** 11/10/2014 4:06:17 PM  
**Acq. Analysis method:** CHIRALPAKIC1-6LNP.M

**Column:** Chiralpak IC, (150 x 4.6) mm, 5µ, SN: IC00CD-QF015

**Pressure at start:** 24 bar **Start flow:** 0.700 ml/min **Column oven:** 27.5 °C

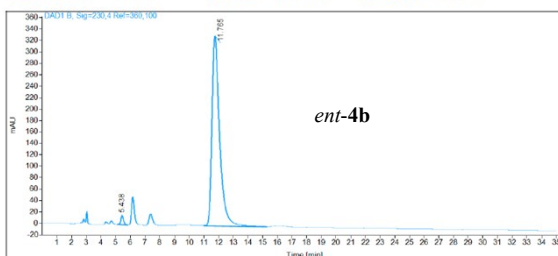

| Name | PC 816 I | RT [min] | Type | Area%  | Area     | Height | Width [min] |
|------|----------|----------|------|--------|----------|--------|-------------|
|      |          | 5.44     | BB   | 1.58   | 192.14   | 15.80  | 0.18        |
|      |          | 11.76    | VB   | 98.42  | 11956.05 | 332.14 | 0.54        |
|      |          | Sum      |      | 100.00 | 12148.19 |        |             |

Sample name: PC 816 + 821 J  
 Data file: C:\SNOOPY\PC\816821\JIC.D  
 Description: Laufmittel: n-Heptan/iPrOH 9:1; Probe ist in LMDCM gelöst.  
 Injection date: 11/11/2014 9:11:01 AM  
 Acq. Analysis method: CHIRALPAKIC1-6LNP.M  
 Column: Chiralpak IC, (150 x 4.6) mm, 5µ, SN: IC00CD-QF015

Pressure at start: 25 bar Start flow: 0.700 ml/min Column oven: 22.83 °C

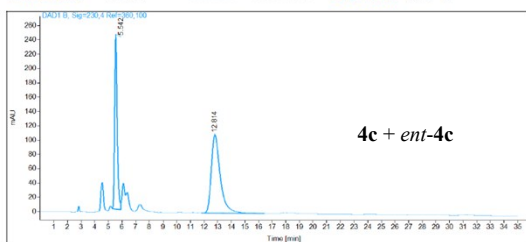

| Name     | PC 816 + 821 J |
|----------|----------------|
| RT [min] | Type           |
| 5.54     | BV             |
| 12.81    | BB             |
| Sum      |                |

| Area%  | Area    | Height | Width [min] |
|--------|---------|--------|-------------|
| 39.51  | 3255.37 | 244.27 | 0.20        |
| 60.49  | 4963.30 | 108.86 | 0.69        |
| 100.00 | 8238.67 |        |             |

Sample name: PC 821 J rep  
 Data file: C:\SNOOPY\PC\PC 821 J REP IC.D  
 Description: Laufmittel: n-Heptan/iPrOH 9:1 Die Probe ist DCMLM gelöst.  
 Injection date: 11/17/2014 11:45:20 AM  
 Acq. Analysis method: CHIRALPAKIC1-6LNP.M  
 Column: Chiralpak IC, (150 x 4.6) mm, 5µ, SN: IC00CD-QF015

Pressure at start: 25 bar Start flow: 0.700 ml/min Column oven: 22.85 °C

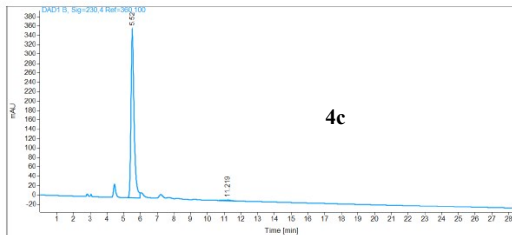

Name: PC 821 J rep

| RT [min] | Type | Area%  | Area    | Height | Width [min] |
|----------|------|--------|---------|--------|-------------|
| 5.52     | BV   | 99.13  | 4941.44 | 360.37 | 0.21        |
| 11.22    | BBA  | 0.87   | 43.35   | 1.53   | 0.39        |
| Sum      |      | 100.00 | 4984.79 |        |             |

Sample name: PC 816 J  
 Data file: C:\SNOOPY\PC\PC 816 J IC.D  
 Description: Laufmittel: n-Heptan/iPrOH 9:1 Die Probe ist DCMLM gelöst.  
 Injection date: 11/11/2014 1:00:13 PM  
 Acq. Analysis method: CHIRALPAKIC1-6LNP.M  
 Column: Chiralpak IC, (150 x 4.6) mm, 5µ, SN: IC00CD-QF015

Pressure at start: 25 bar Start flow: 0.700 ml/min Column oven: 23.24 °C

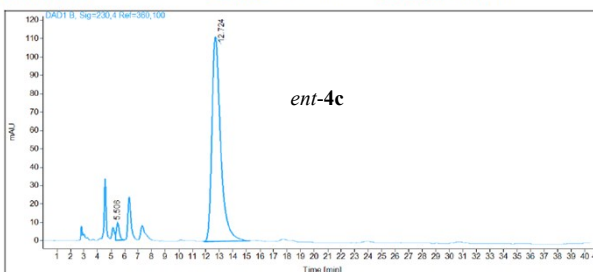

Name: PC 816 J

| RT [min] | Type | Area%  | Area    | Height | Width [min] |
|----------|------|--------|---------|--------|-------------|
| 5.51     | BV   | 2.71   | 138.50  | 9.24   | 0.22        |
| 12.72    | BB   | 97.29  | 4966.67 | 111.29 | 0.67        |
| Sum      |      | 100.00 | 5107.17 |        |             |

Sample Name: PC 816K + 821 K  
 Data file: D:\GONZO\PC\81621KAD.D  
 Sample Info: Laufmittel: n-Heptan/iPrOH 7:3;  
 Die Probe ist in DCM/LM gelöst.

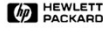

Säule: DAICELAD.M  
 Säuleninfo: Chiralpak AD (250x4,6)mm  
 Operator: Analytik Labor AKEN

Injektion Time: 08:35:10  
 Injektion Date: 10.11.2014

Instrument Conditions: At Start At Stop  
 Temperature in °C: 30.0°C 30.0°C  
 Pressure in bar: 22.7 22.9  
 Flow in ml/min: 0.70 0.70

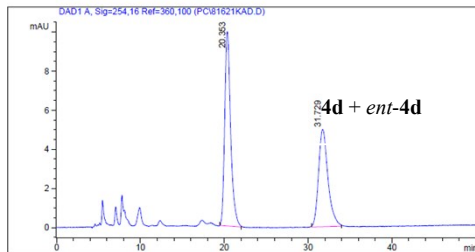

| #     | Ret. Time (min) | Width | Height (mAU) | Area (mAU*s) | Area % |        |
|-------|-----------------|-------|--------------|--------------|--------|--------|
| 1     | 20.35           | 0.74  | 9.55         | 489.81       | 55.69  |        |
| 2     | 31.73           | 1.12  | 4.98         | 399.73       | 44.31  |        |
| Total |                 |       |              |              | 879.54 | 100.00 |

Sample Name: PC 821 K  
 Data file: D:\GONZO\PC\821KAD.D  
 Sample Info: Laufmittel: n-Heptan/iPrOH 7:3;  
 Die Probe ist in LM/DCM gelöst

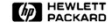

Säule: DAICELAD.M  
 Säuleninfo: Chiralpak AD (250x4,6)mm  
 Operator: Analytik Labor AKEN

Injektion Time: 14:23:54  
 Injektion Date: 07.11.2014

Instrument Conditions: At Start At Stop  
 Temperature in °C: 30.0°C 30.0°C  
 Pressure in bar: 22.2 23.1  
 Flow in ml/min: 0.70 0.70

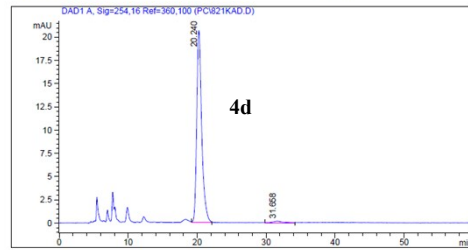

| #     | Ret. Time (min) | Width | Height (mAU) | Area (mAU*s) | Area %  |        |
|-------|-----------------|-------|--------------|--------------|---------|--------|
| 1     | 20.24           | 0.76  | 20.64        | 1035.65      | 96.71   |        |
| 2     | 31.66           | 2.34  | 0.25         | 35.29        | 3.29    |        |
| Total |                 |       |              |              | 1070.93 | 100.00 |

Sample Name: PC 816 K  
 Data file: D:\GONZO\PC\816KAD.D  
 Sample Info: Laufmittel: n-Heptan/iPrOH 7:3;  
 Die Probe ist in LM/DCM gelöst

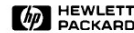

Säule: DAICELAD.M  
 Säuleninfo: Chiralpak AD (250x4,6)mm  
 Operator: Analytik Labor AKEN

Injektion Time: 13:22:39  
 Injektion Date: 07.11.2014

Instrument Conditions: At Start At Stop  
 Temperature in °C: 30.0°C 30.0°C  
 Pressure in bar: 22.6 22.7  
 Flow in ml/min: 0.70 0.70

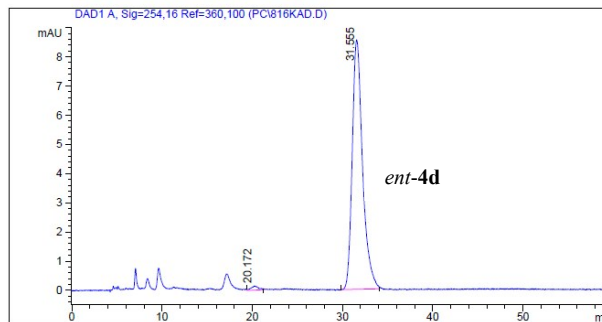

| #     | Ret. Time (min) | Width | Height (mAU) | Area (mAU*s) | Area % |        |
|-------|-----------------|-------|--------------|--------------|--------|--------|
| 1     | 20.17           | 0.96  | 0.14         | 8.20         | 1.19   |        |
| 2     | 31.56           | 1.04  | 8.55         | 679.06       | 98.81  |        |
| Total |                 |       |              |              | 687.26 | 100.00 |

**Sample name:** PC 816-821 L  
**Data file:** C:\SNOOPY\PC816821\IA.D  
**Description:** Laufmittel: n-Heptan/EtOH 9:1; Probe ist in LMDCM gelöst.  
**Injection date:** 11/13/2014 11:22:27 AM  
**Acq. Analysis method:** CHIRALPAKIARNP.M  
**Column:** Chiralpak IA, (250 x 4,6) mm, 5µ, SN: IA00CE-RC036

**Pressure at start:** 51 bar    **Start flow:** 1.000 ml/min    **Column oven:** 30 °C

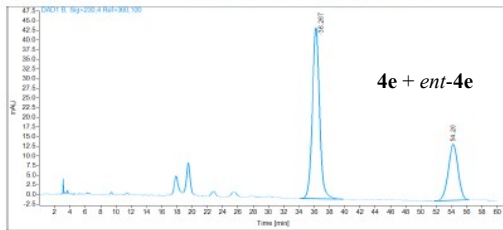

| Name | RT [min] | Type | Area%  | Area    | Height | Width [min] |
|------|----------|------|--------|---------|--------|-------------|
|      | 36.27    | BB   | 69.27  | 2933.85 | 44.22  | 1.01        |
|      | 54.26    | BB   | 30.73  | 1301.79 | 14.48  | 1.40        |
| Sum  |          |      | 100.00 | 4235.64 |        |             |

**Sample name:** PC 821 L  
**Data file:** C:\SNOOPY\PC821\IA1.D  
**Description:** Laufmittel: n-Heptan/EtOH 9:1; Probe ist in LMDCM gelöst.  
**Injection date:** 11/13/2014 4:44:19 PM  
**Acq. Analysis method:** CHIRALPAKIARNP.M  
**Column:** Chiralpak IA, (250 x 4,6) mm, 5µ, SN: IA00CE-RC036

**Pressure at start:** 50 bar    **Start flow:** 1.000 ml/min    **Column oven:** 30 °C

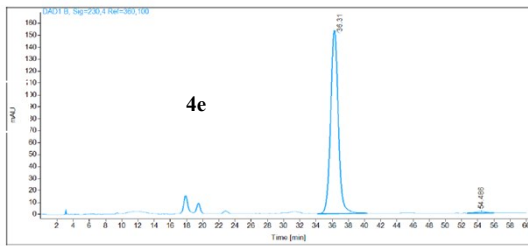

| Name | RT [min] | Type | Area%  | Area     | Height | Width [min] |
|------|----------|------|--------|----------|--------|-------------|
|      | 36.31    | BB   | 98.86  | 10098.42 | 153.32 | 1.01        |
|      | 54.49    | BB   | 1.14   | 116.76   | 1.36   | 1.03        |
| Sum  |          |      | 100.00 | 10215.18 |        |             |

**Sample name:** PC 816 L  
**Data file:** C:\SNOOPY\PC816\IA.D  
**Description:** Laufmittel: n-Heptan/EtOH 9:1; Probe ist in LMDCM gelöst.  
**Injection date:** 11/13/2014 3:43:13 PM  
**Acq. Analysis method:** CHIRALPAKIARNP.M  
**Column:** Chiralpak IA, (250 x 4,6) mm, 5µ, SN: IA00CE-RC036

**Pressure at start:** 52 bar    **Start flow:** 1.000 ml/min    **Column oven:** 30 °C

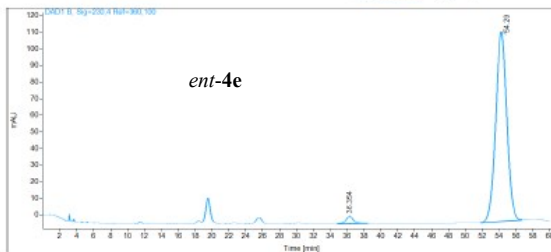

| Name | RT [min] | Type | Area%  | Area     | Height | Width [min] |
|------|----------|------|--------|----------|--------|-------------|
|      | 36.38    | BB   | 2.54   | 271.62   | 4.19   | 0.95        |
|      | 54.29    | BB   | 97.46  | 10411.30 | 113.98 | 1.41        |
| Sum  |          |      | 100.00 | 10682.91 |        |             |

**Sample name:** PC 816-821N  
**Data file:** C:\SNOOPY\PC\816821\NYIC.D  
**Description:** Laufmittel: n-Heptan/PrOH 9:1;  
 Probe ist in LM/DCM gelöst  
**Injection date:** 11/25/2014 2:57:22 PM  
**Acq. Analysis method:** CHIRALPAKIC1-8LNP.M

**Column:** Chiralpak IC, (150 x 4,8) mm, 5µ, SN: IC00CD-QF015  
**Pressure at start:** 26 bar **Start flow:** 0.700 ml/min **Column oven:** 29.99 °C

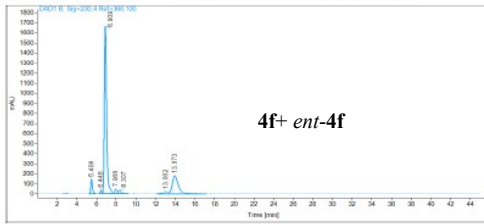

| RT [min] | Type | Area%  | Area     | Height  | Width [min] |
|----------|------|--------|----------|---------|-------------|
| 5.50     | BB   | 4.43   | 1681.12  | 143.46  | 0.18        |
| 6.45     | VV   | 1.25   | 473.77   | 36.70   | 0.20        |
| 8.31     | VV   | 68.53  | 25981.00 | 1685.22 | 0.24        |
| 13.97    | VV   | 2.05   | 778.44   | 43.26   | 0.27        |
| 8.31     | VB   | 2.11   | 801.79   | 36.30   | 0.32        |
| 13.06    | BV   | 1.85   | 700.58   | 20.99   | 0.49        |
| 13.97    | VB   | 19.77  | 7484.91  | 178.31  | 0.63        |
| Sum      |      | 100.00 | 37911.62 |         |             |

**Sample name:** PC 821 N  
**Data file:** C:\SNOOPY\PC\821\NYIC.D  
**Description:** Laufmittel: n-Heptan/PrOH 9:1;  
 Probe ist in LM/DCM gelöst  
**Injection date:** 11/25/2014 4:29:35 PM  
**Acq. Analysis method:** CHIRALPAKIC1-8LNP.M

**Column:** Chiralpak IC, (150 x 4,8) mm, 5µ, SN: IC00CD-QF015  
**Pressure at start:** 26 bar **Start flow:** 0.700 ml/min **Column oven:** 29.99 °C

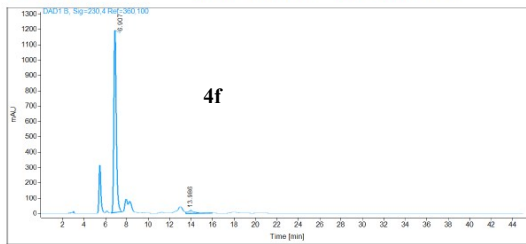

| RT [min] | Type | Area%  | Area     | Height  | Width [min] |
|----------|------|--------|----------|---------|-------------|
| 6.91     | BB   | 4.37   | 16099.85 | 1160.18 | 0.23        |
| 13.99    | VB   | 4.37   | 827.46   | 17.75   | 0.69        |
| Sum      |      | 100.00 | 16927.14 |         |             |

**Sample name:** PC 816 N  
**Data file:** C:\SNOOPY\PC\816\NYIC.D  
**Description:** Laufmittel: n-Heptan/PrOH 9:1;  
 Probe ist in LM/DCM gelöst  
**Injection date:** 11/25/2014 3:43:29 PM  
**Acq. Analysis method:** CHIRALPAKIC1-8LNP.M

**Column:** Chiralpak IC, (150 x 4,8) mm, 5µ, SN: IC00CD-QF015

**Pressure at start:** 28 bar **Start flow:** 0.700 ml/min **Column oven:** 30 °C

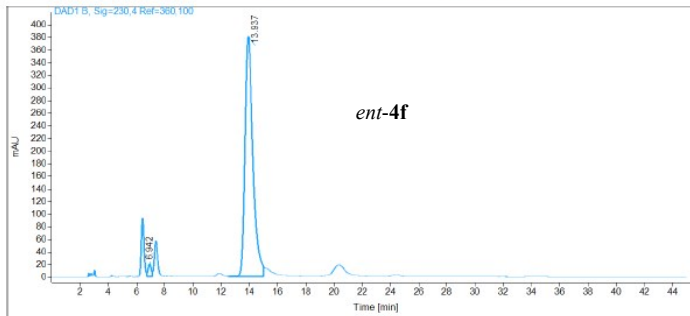

| RT [min] | Type | Area%  | Area     | Height | Width [min] |
|----------|------|--------|----------|--------|-------------|
| 6.94     | VV   | 2.01   | 308.25   | 20.40  | 0.23        |
| 13.94    | MF   | 97.99  | 15050.47 | 380.63 | 0.66        |
| Sum      |      | 100.00 | 15358.72 |        |             |

Sample Name: PC 816 C  
 Data file: D:\GONZO\PC\816CRAD.D  
 Sample Info: Laufmittel: n-Heptan/IP 7:3;  
 Die Probe ist in LM/DCM gelöst

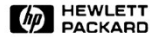

Säule: DAICELAD.M  
 Säuleninfo: Chiralpak AD (250x4,6)mm  
 Operator: Analytik Labor AKEN

Injektion Time: 20:01:16  
 Injektion Date: 23.09.2014

Instrument Conditions: At Start At Stop  
 Temperature in °C: 30.0°C 30.0°C  
 Pressure in bar: 33.5 34.3  
 Flow in ml/min: 1.00 1.00

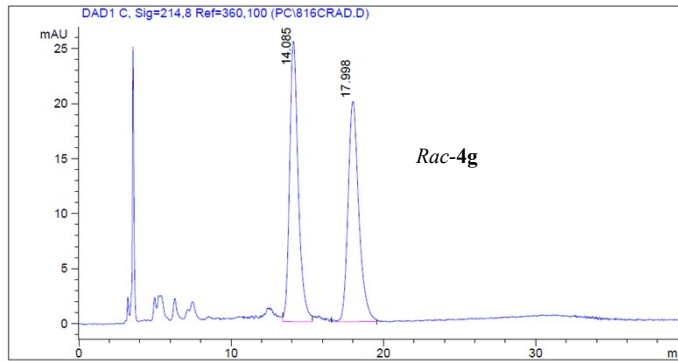

| #     | Ret. Time (min) | Width | Height (mAU) | Area (mAU*s) | Area % |
|-------|-----------------|-------|--------------|--------------|--------|
| 1     | 14.09           | 0.55  | 25.48        | 1005.96      | 50.52  |
| 2     | 18.00           | 0.65  | 20.02        | 985.10       | 49.48  |
| Total |                 |       |              | 1991.06      | 100.00 |

Sample Name: PC 821 C  
 Data file: D:\GONZO\PC\821CAD.D  
 Sample Info: Laufmittel: n-Heptan/iPrOH 7:3;  
 Die Probe ist in DCM/LM gelöst.

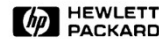

Säule: DAICELAD.M  
 Säuleninfo: Chiralpak AD (250x4,6)mm  
 Operator: Analytik Labor AKEN

Injektion Time: 14:19:47  
 Injektion Date: 17.11.2014

Instrument Conditions: At Start At Stop  
 Temperature in °C: 30.0°C 30.0°C  
 Pressure in bar: 34.5 35.3  
 Flow in ml/min: 1.00 1.00

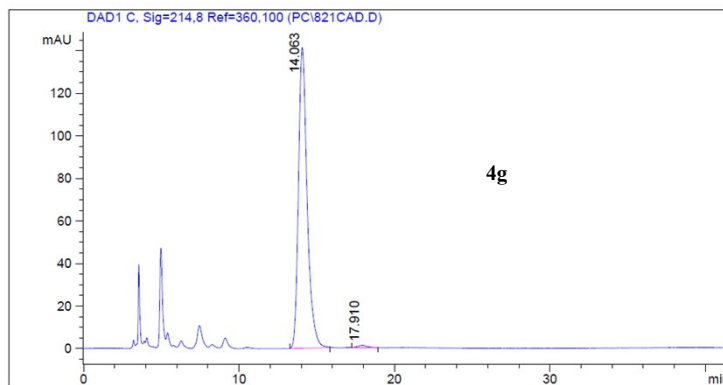

| #     | Ret. Time (min) | Width | Height (mAU) | Area (mAU*s) | Area % |
|-------|-----------------|-------|--------------|--------------|--------|
| 1     | 14.06           | 0.59  | 141.41       | 5495.21      | 99.16  |
| 2     | 17.91           | 0.51  | 1.09         | 46.42        | 0.84   |
| Total |                 |       |              | 5541.63      | 100.00 |

Sample Name: PC 816 A  
 Data file: D:\GONZO\PC\816ARAD.D  
 Sample Info: Laufmittel: n-Heptan/iPrOH 7:3;  
 Die Probe ist in LM/DCM gelöst

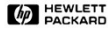

Säule: DAICELAD.M  
 Säuleninfo: Chiralpak AD (250x4,6)mm  
 Operator: Analytik Labor AKEN

Injektion Time: 19:20:04  
 Injektion Date: 23.09.2014

Instrument Conditions: At Start At Stop  
 Temperature in°C: 30.0°C 30.0°C  
 Pressure in bar: 33.3 34.3  
 Flow in ml/min: 1.00 1.00

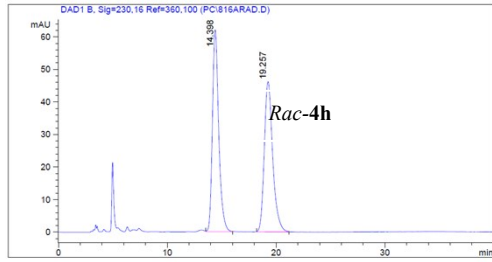

| #     | Ret. Time (min) | Width | Height (mAU) | Area (mAU*s) | Area % |
|-------|-----------------|-------|--------------|--------------|--------|
| 1     | 14.40           | 0.61  | 62.04        | 2491.52      | 50.14  |
| 2     | 19.26           | 0.81  | 46.17        | 2477.41      | 49.86  |
| Total |                 |       |              | 4968.93      | 100.00 |

Sample Name: PC 821 A  
 Data file: D:\GONZO\PC\821AAD.D  
 Sample Info: Laufmittel: n-Heptan/iPrOH 7:3;  
 Die Probe ist in LM/DCM gelöst

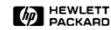

Säule: DAICELAD.M  
 Säuleninfo: Chiralpak AD (250x4,6)mm  
 Operator: Analytik Labor AKEN

Injektion Time: 15:58:19  
 Injektion Date: 10.11.2014

Instrument Conditions: At Start At Stop  
 Temperature in°C: 30.0°C 30.0°C  
 Pressure in bar: 34.3 35.3  
 Flow in ml/min: 1.00 1.00

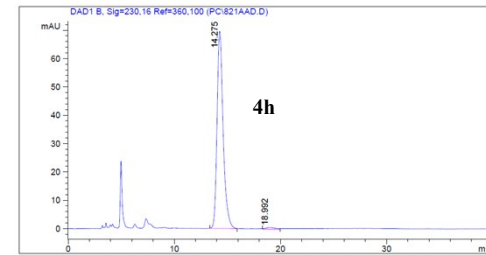

| #     | Ret. Time (min) | Width | Height (mAU) | Area (mAU*s) | Area % |
|-------|-----------------|-------|--------------|--------------|--------|
| 1     | 14.27           | 0.60  | 69.61        | 2787.92      | 98.64  |
| 2     | 18.99           | 1.04  | 0.61         | 38.46        | 1.36   |
| Total |                 |       |              | 2826.38      | 100.00 |

Sample Name: PC 821 A1  
 Data file: D:\GONZO\PC\821A1AD.D  
 Sample Info: Laufmittel: n-Heptan/iPrOH 7:3;  
 Die Probe ist in LM/DCM gelöst

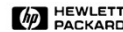

Säule: DAICELAD.M  
 Säuleninfo: Chiralpak AD (250x4,6)mm  
 Operator: Analytik Labor AKEN

Injektion Time: 11:44:53  
 Injektion Date: 20.11.2014

Instrument Conditions: At Start At Stop  
 Temperature in°C: 30.0°C 30.0°C  
 Pressure in bar: 34.3 35.0  
 Flow in ml/min: 1.00 1.00

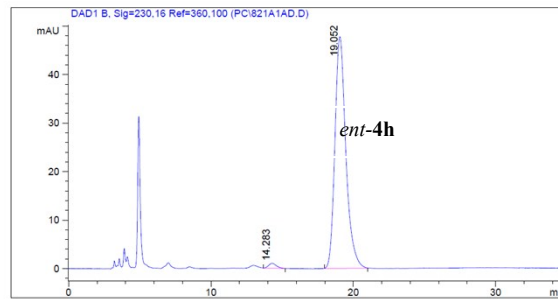

| #     | Ret. Time (min) | Width | Height (mAU) | Area (mAU*s) | Area % |
|-------|-----------------|-------|--------------|--------------|--------|
| 1     | 14.28           | 0.49  | 1.06         | 41.37        | 1.59   |
| 2     | 19.05           | 0.82  | 47.79        | 2553.57      | 98.41  |
| Total |                 |       |              | 2594.93      | 100.00 |

Sample Name: PC 816 B rac  
 Data file: D:\GONZO\PC\816BR2OD.D  
 Sample Info: Laufmittel: n-Heptan/EtOH 9:1;  
 Die Probe ist in DCM/LM gelöst

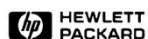

Säule: DAICELOD.M  
 Säuleninfo: Chiralcel OD (250x4,6)mm  
 Operator: Analytik Labor AKEN

Injektion Time: 10:33:20  
 Injektion Date: 24.10.2014

Instrument Conditions: At Start At Stop  
 Temperature in °C: 30.0°C 30.0°C  
 Pressure in bar: 29.4 29.8  
 Flow in ml/min: 1.00 1.00

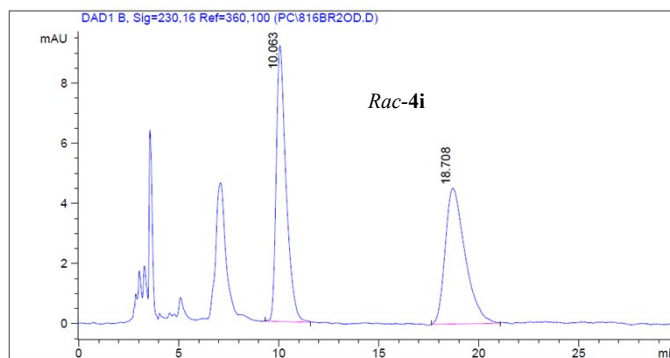

| #     | Ret. Time (min) | Width | Height (mAU) | Area (mAU*s) | Area % |
|-------|-----------------|-------|--------------|--------------|--------|
| 1     | 10.06           | 0.51  | 9.16         | 313.43       | 50.13  |
| 2     | 18.71           | 1.04  | 4.51         | 311.86       | 49.87  |
| Total |                 |       |              | 625.28       | 100.00 |

Sample Name: PC 821 B  
 Data file: D:\GONZO\PC\821BOD.D  
 Sample Info: Laufmittel: n-Heptan/iPrOH 9:1;  
 Die Probe ist in DCM/LM gelöst

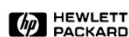

Säule: DAICELOD.M  
 Säuleninfo: Chiralcel OD (250x4,6)mm  
 Operator: Analytik Labor AKEN

Injektion Time: 08:19:03  
 Injektion Date: 24.11.2014

Instrument Conditions: At Start At Stop  
 Temperature in °C: 30.0°C 30.0°C  
 Pressure in bar: 29.9 30.3  
 Flow in ml/min: 1.00 1.00

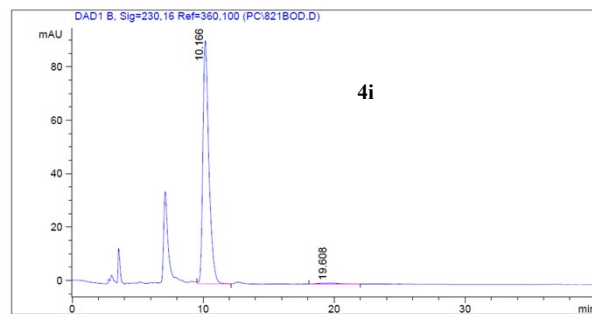

| #     | Ret. Time (min) | Width | Height (mAU) | Area (mAU*s) | Area % |
|-------|-----------------|-------|--------------|--------------|--------|
| 1     | 10.17           | 0.48  | 90.98        | 2910.53      | 98.54  |
| 2     | 19.61           | 1.29  | 0.41         | 43.07        | 1.46   |
| Total |                 |       |              | 2953.60      | 100.00 |



Sample Name: PC 816 E rac  
 Data file: D:\GONZO\PC\816ER2OD.D  
 Sample Info: Laufmittel: n-Heptan/EtOH 9:1;  
 Die Probe ist in DCM/LM gelöst

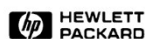

Säule: DAICELOD.M  
 Säuleninfo: Chiralcel OD (250x4,6)mm  
 Operator: Analytik Labor AKEN

Injektion Time: 11:04:33  
 Injektion Date: 24.10.2014

Instrument Conditions: At Start At Stop  
 Temperature in °C: 30.0 °C 30.0 °C  
 Pressure in bar: 29.2 29.6  
 Flow in ml/min: 1.00 1.00

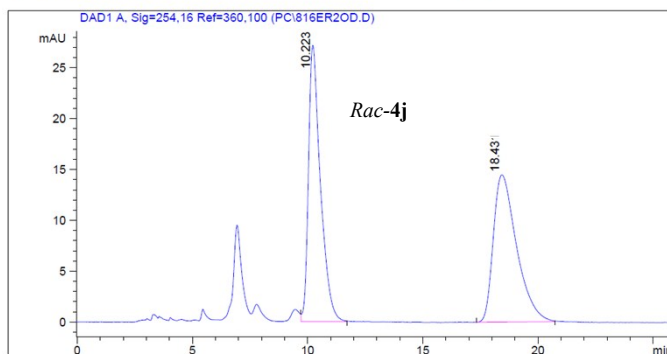

| #     | Ret. Time (min) | Width | Height (mAU) | Area (mAU*s) | Area % |
|-------|-----------------|-------|--------------|--------------|--------|
| 1     | 10.22           | 0.52  | 27.18        | 979.52       | 49.03  |
| 2     | 18.43           | 1.06  | 14.48        | 1018.10      | 50.97  |
| Total |                 |       |              | 1997.62      | 100.00 |

Sample Name: PC 821 E  
 Data file: D:\GONZO\PC\821EOD.D  
 Sample Info: Laufmittel: n-Heptan/EtOH 9:1;  
 Die Probe ist in DCM/LM gelöst.

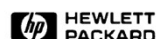

Säule: DAICELOD.M  
 Säuleninfo: Chiralcel OD (250x4,6)mm  
 Operator: Analytik Labor AKEN

Injektion Time: 10:17:09  
 Injektion Date: 18.11.2014

Instrument Conditions: At Start At Stop  
 Temperature in °C: 30.0 °C 30.0 °C  
 Pressure in bar: 29.7 30.2  
 Flow in ml/min: 1.00 1.00

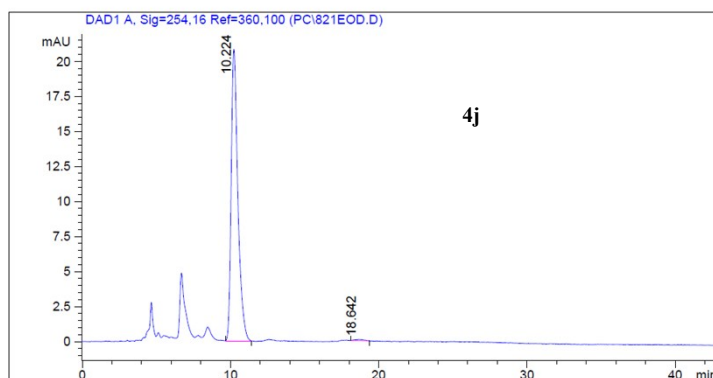

| #     | Ret. Time (min) | Width | Height (mAU) | Area (mAU*s) | Area % |
|-------|-----------------|-------|--------------|--------------|--------|
| 1     | 10.22           | 0.48  | 20.85        | 656.61       | 99.39  |
| 2     | 18.64           | 0.70  | 0.10         | 4.01         | 0.61   |
| Total |                 |       |              | 660.62       | 100.00 |

**Sample name:** PC 816 F rac  
**Data file:** C:\SNOOPY\PC\PC 816 F.RAC IC.D  
**Description:** Laufmittel: n-Heptan/iPrOH 9:1 Die Probe ist DCMLM gelöst.  
**Injection date:** 11/26/2014 8:27:48 AM  
**Acq. Analysis method:** CHIRALPAKIC1-6LNP.M  
**Column:** Chiralpak IC, (150 x 4.6) mm, 5µ, SN: IC00CD-QF015

**Pressure at start:** 26 bar    **Start flow:** 0.700 ml/min    **Column oven:** 30 °C

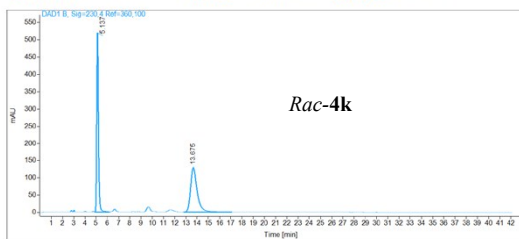

| Name         | RT [min] | Type | Area%  | Area     | Height | Width [min] |
|--------------|----------|------|--------|----------|--------|-------------|
| PC 816 F rac |          |      |        |          |        |             |
|              | 5.14     | VV   | 50.40  | 5403.85  | 518.84 | 0.16        |
|              | 13.68    | BB   | 49.60  | 5317.10  | 129.58 | 0.62        |
|              | Sum      |      | 100.00 | 10720.96 |        |             |

**Sample name:** PC 821 F  
**Data file:** C:\SNOOPY\PC\821FIC.D  
**Description:** Laufmittel: n-Heptan/iPrOH 9:1; Probe ist in LM/DCM gelöst  
**Injection date:** 11/27/2014 9:03:07 AM  
**Acq. Analysis method:** CHIRALPAKIC1-6LNP.M  
**Column:** Chiralpak IC, (150 x 4.6) mm, 5µ, SN: IC00CD-QF015

**Pressure at start:** 27 bar    **Start flow:** 0.700 ml/min    **Column oven:** 29.99 °C

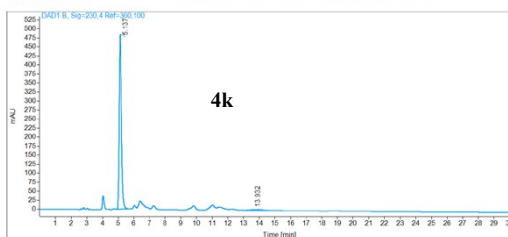

| Name     | RT [min] | Type | Area%  | Area    | Height | Width [min] |
|----------|----------|------|--------|---------|--------|-------------|
| PC 821 F |          |      |        |         |        |             |
|          | 5.14     | BB   | 97.60  | 4970.08 | 485.03 | 0.16        |
|          | 13.93    | BB   | 2.40   | 122.25  | 2.50   | 0.70        |
|          | Sum      |      | 100.00 | 5092.34 |        |             |

**Sample name:** PC 821 F (QD)  
**Data file:** C:\SNOOPY\PC\821FQD IC.D  
**Description:** Laufmittel: n-Heptan/iPrOH 9:1; Probe ist in LM/DCM gelöst  
**Injection date:** 11/27/2014 8:34:36 AM  
**Acq. Analysis method:** CHIRALPAKIC1-6LNP.M  
**Column:** Chiralpak IC, (150 x 4.6) mm, 5µ, SN: IC00CD-QF015

**Pressure at start:** 27 bar    **Start flow:** 0.700 ml/min    **Column oven:** 29.99 °C

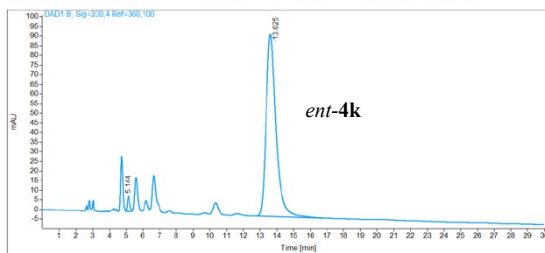

| Name          | RT [min] | Type | Area%  | Area    | Height | Width [min] |
|---------------|----------|------|--------|---------|--------|-------------|
| PC 821 F (QD) |          |      |        |         |        |             |
|               | 5.14     | VV   | 1.96   | 77.88   | 7.81   | 0.15        |
|               | 13.63    | VB   | 98.04  | 3884.73 | 94.70  | 0.62        |
|               | Sum      |      | 100.00 | 3962.41 |        |             |

Sample Name: PC 816 G rac  
 Data file: D:\GONZO\PC\816GR1AD.D  
 Sample Info: Laufmittel: n-Heptan/iPrOH 7:3;  
 Die Probe ist in LM/DCM gelöst

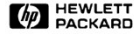

Säule: DAICELAD.M  
 Säuleninfo: Chiralpak AD (250x4,6)mm  
 Operator: Analytik Labor AKEN

Injektion Time: 14:09:43  
 Injektion Date: 20.11.2014

Instrument Conditions: At Start At Stop  
 Temperature in °C: 30.0°C 30.0°C  
 Pressure in bar: 34.3 35.0  
 Flow in ml/min: 1.00 1.00

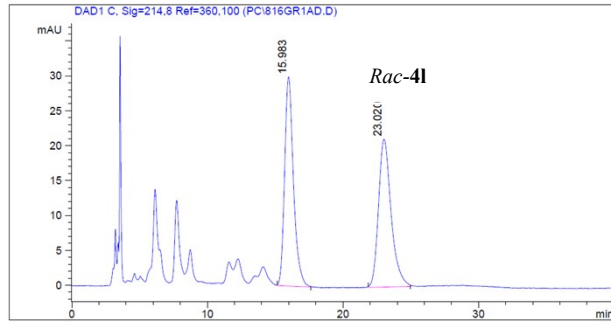

| #     | Ret. Time (min) | Width | Height (mAU) | Area (mAU*s) | Area % |
|-------|-----------------|-------|--------------|--------------|--------|
| 1     | 15.98           | 0.68  | 29.97        | 1359.98      | 49.82  |
| 2     | 23.02           | 0.95  | 21.17        | 1369.74      | 50.18  |
| Total |                 |       |              | 2729.72      | 100.00 |

Sample Name: PC 821 G  
 Data file: D:\GONZO\PC\821GADAD.D  
 Sample Info: Laufmittel: n-Heptan/EtOH 7:3;  
 Die Probe ist in DCM/LM gelöst.

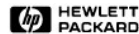

Säule: DAICELAD.M  
 Säuleninfo: Chiralpak AD (250x4,6)mm  
 Operator: Analytik Labor AKEN

Injektion Time: 13:13:13  
 Injektion Date: 21.11.2014

Instrument Conditions: At Start At Stop  
 Temperature in °C: 30.0°C 30.0°C  
 Pressure in bar: 34.4 34.8  
 Flow in ml/min: 1.00 1.00

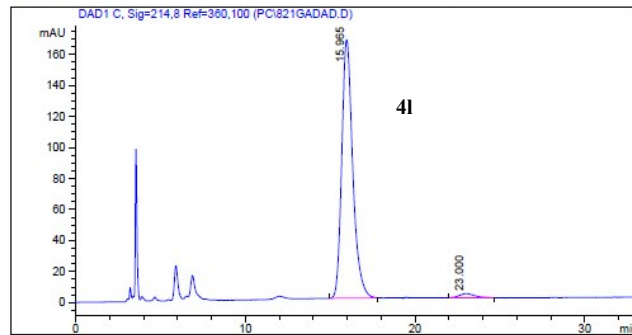

| #     | Ret. Time (min) | Width | Height (mAU) | Area (mAU*s) | Area % |
|-------|-----------------|-------|--------------|--------------|--------|
| 1     | 15.96           | 0.68  | 166.71       | 7514.89      | 97.75  |
| 2     | 23.00           | 0.76  | 2.70         | 172.71       | 2.25   |
| Total |                 |       |              | 7687.60      | 100.00 |

**Sample name:** PC 816 H rac  
**Data file:** C:\SNOOPY\PC\816HRIC.D  
**Description:** Laufmittel: n-Heptan/iPrOH 9:1;  
 Probe ist in LMDCM gelöst  
**Injection date:** 11/24/2014 12:36:57 PM  
**Acq. Analysis method:** CHIRALPAKIC1-6LNP.M  
**Column:** Chiralpak IC, (150 x 4,6) mm, 5µ, SN: IC00CD-QF015

**Pressure at start:** 26 bar    **Start flow:** 0.700 ml/min    **Column oven:** 29.99 °C

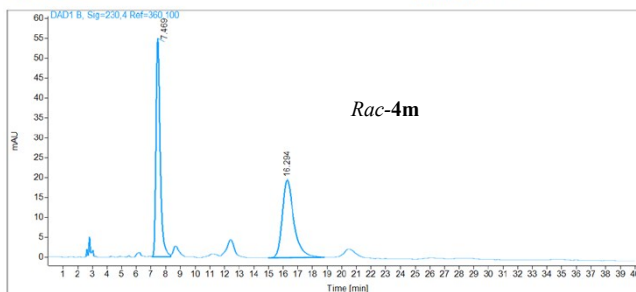

| Name | RT [min] | Type | Area%  | Area    | Height | Width [min] |
|------|----------|------|--------|---------|--------|-------------|
|      | 7.47     | BV   | 49.72  | 1059.69 | 55.04  | 0.29        |
|      | 16.29    | BB   | 50.28  | 1071.55 | 19.54  | 0.83        |
| Sum  |          |      | 100.00 | 2131.23 |        |             |

**Sample name:** PC 821 H  
**Data file:** C:\SNOOPY\PC\821HIC.D  
**Description:** Laufmittel: n-Heptan/iPrOH 9:1;  
 Probe ist in LMDCM gelöst  
**Injection date:** 11/24/2014 4:13:47 PM  
**Acq. Analysis method:** CHIRALPAKIC1-6LNP.M  
**Column:** Chiralpak IC, (150 x 4,6) mm, 5µ, SN: IC00CD-QF015

**Pressure at start:** 26 bar    **Start flow:** 0.700 ml/min    **Column oven:** 29.99 °C

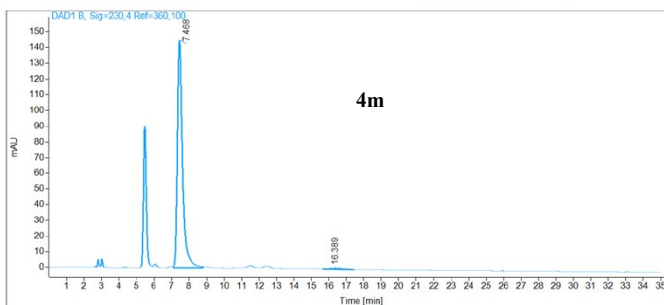

| Name | RT [min] | Type | Area%  | Area    | Height | Width [min] |
|------|----------|------|--------|---------|--------|-------------|
|      | 7.47     | VV   | 98.71  | 2881.33 | 144.88 | 0.30        |
|      | 16.39    | BB   | 1.29   | 37.53   | 0.77   | 0.63        |
| Sum  |          |      | 100.00 | 2918.87 |        |             |

**Sample name:** SM 58b + 59b  
**Data file:** C:\SNOOPY\SM\5859\BNIC.D  
**Description:** Laufmittel: n-Heptan/EtOH 9:1; Die Probe ist im LM/DCM gelöst.  
**Injection date:** 4/17/2014 1:10:44 PM  
**Acq. Analysis method:** CHIRALPAKIC1-6LNP.M

**Column:** Chiralpak IC, (150 x 4,6) mm, 5µ, SN: IC00CD-QF015

**Pressure at start:** 24 bar    **Start flow:** 0.700 ml/min    **Column oven:** 30 °C

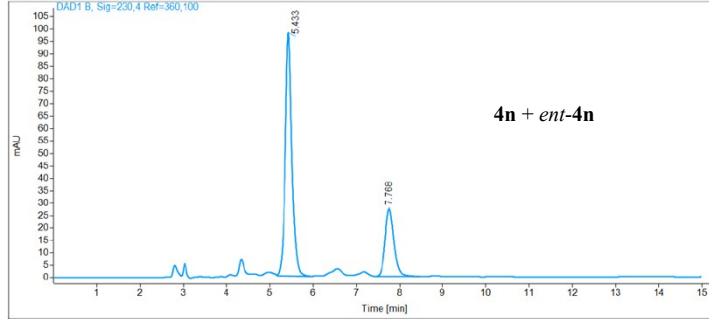

| RT [min] | Type | Area%  | Area    | Height | Width [min] |
|----------|------|--------|---------|--------|-------------|
| 5.43     | VB   | 72.67  | 1033.19 | 97.76  | 0.16        |
| 7.77     | BB   | 27.33  | 388.61  | 27.06  | 0.22        |
| Sum      |      | 100.00 | 1421.79 |        |             |

**Sample name:** PC 819  
**Data file:** C:\SNOOPY\PC\PC 819 IC.D  
**Description:** Laufmittel: n-Heptan/EtOH 9:1 Die Probe ist DCM/LM gelöst.  
**Injection date:** 11/3/2014 9:11:21 AM  
**Acq. Analysis method:** CHIRALPAKIC1-6LNP.M

**Column:** Chiralpak IC, (150 x 4,6) mm, 5µ, SN: IC00CD-QF015

**Pressure at start:** 34 bar    **Start flow:** 0.700 ml/min    **Column oven:** 34.22 °C

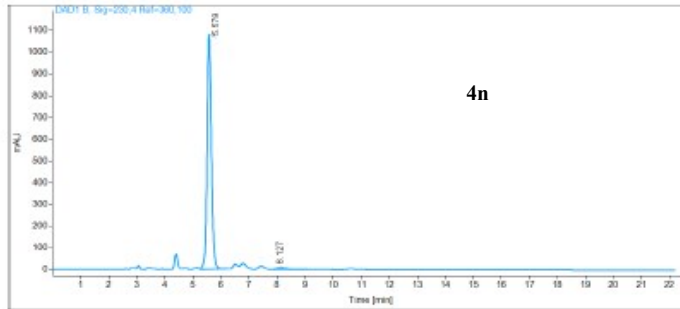

| RT [min] | Type | Area%  | Area     | Height  | Width [min] |
|----------|------|--------|----------|---------|-------------|
| 5.58     | VB   | 98.42  | 10983.01 | 1081.63 | 0.15        |
| 8.13     | BB   | 1.58   | 175.97   | 7.57    | 0.37        |
| Sum      |      | 100.00 | 11158.98 |         |             |

**Sample name:** SM 58c + 59c  
**Data file:** C:\SNOOPY\SM\SM 58C + 59C IC.D  
**Description:** Laufmittel: n-Heptan/ETOH 97:3 Die Probe ist DCM/LM gelöst.  
**Injection date:** 4/15/2014 1:22:37 PM  
**Acq. Analysis method:** CHIRALPAKIC1-6LNP.M  
**Column:** Chiralpak IC, (150 x 4,6) mm, 5µ, SN: IC00CD-QF015

**Pressure at start:** 24 bar      **Start flow:** 0.700 ml/min      **Column oven:** 29.97 °C

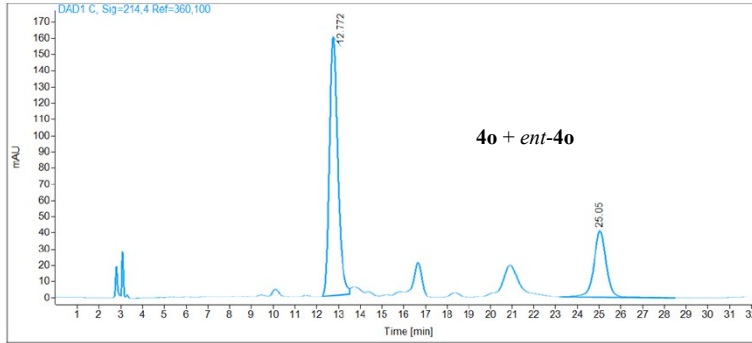

| Name         | RT [min] | Type | Area%  | Area    | Height | Width [min] |
|--------------|----------|------|--------|---------|--------|-------------|
| SM 58c + 59c | 12.77    | BV   | 71.89  | 4179.24 | 159.53 | 0.40        |
|              | 25.05    | BB   | 28.11  | 1633.96 | 40.59  | 0.61        |
|              | Sum      |      | 100.00 | 5813.21 |        |             |

**Sample name:** PC 58 C rep2  
**Data file:** C:\SNOOPY\PC\58CREP2XIC.D  
**Description:** Laufmittel: n-Heptan/ETOH 97:3; Probe ist in LM/DCM gelöst  
**Injection date:** 11/18/2014 6:18:37 PM  
**Acq. Analysis method:** CHIRALPAKIC1-6LNP.M  
**Column:** Chiralpak IC, (150 x 4,6) mm, 5µ, SN: IC00CD-QF015

**Pressure at start:** 23 bar      **Start flow:** 0.700 ml/min      **Column oven:** 29.98 °C

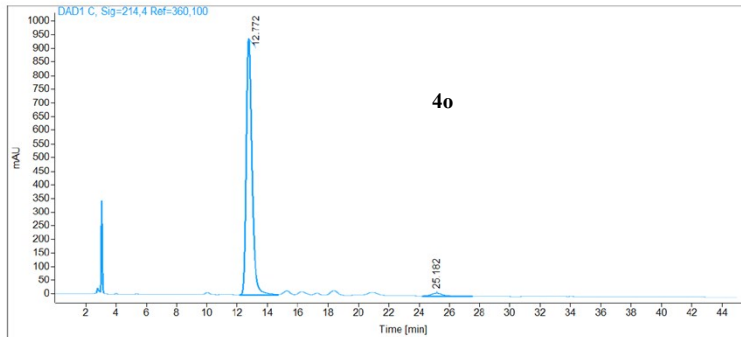

| Name         | RT [min] | Type | Area%  | Area     | Height | Width [min] |
|--------------|----------|------|--------|----------|--------|-------------|
| PC 58 C rep2 | 12.77    | BV   | 98.02  | 24348.06 | 938.63 | 0.39        |
|              | 25.18    | BB   | 1.98   | 490.94   | 9.88   | 0.77        |
|              | Sum      |      | 100.00 | 24839.00 |        |             |
